# Supplementary material for: Cytochrome P450 CitCYP97B modulates carotenoid accumulation diversity by hydroxylating β-cryptoxanthin in Citrus
Source: PubMed Central journal article supplement — Plant Commun. 2024 Feb 19;5(6):100847. doi: 10.1016/j.xplc.2024.100847 (PMC11211522; doi:10.1016/j.xplc.2024.100847), 2024-02-19
Supplement: mmc1.pdf [file mmc1.pdf]

**Plant Communications, Volume 5**

**Supplemental information**

**Cytochrome P450 CitCYP97B modulates carotenoid accumulation diversity by hydroxylating  $\beta$ -cryptoxanthin in *Citrus***

**Yingzi Zhang, Jiajing Jin, Nan Wang, Quan Sun, Di Feng, Shenchao Zhu, Zexin Wang, Shunxin Li, Junli Ye, Lijun Chai, Zongzhou Xie, and Xiuxin Deng**

## Supplemental Information

### **Cytochrome P450 CitCYP97B modulates carotenoid accumulation diversity by hydroxylating $\beta$ -cryptoxanthin in *Citrus***

Yingzi Zhang<sup>1</sup>, Jiajing Jin<sup>1</sup>, Nan Wang<sup>1</sup>, Quan Sun<sup>1</sup>, Di Feng<sup>1</sup>, Shenchao Zhu<sup>1</sup>, Zexin Wang<sup>1</sup>, Shunxin Li<sup>1</sup>, Junli Ye<sup>1</sup>, Lijun Chai<sup>1</sup>, Zongzhou Xie<sup>1</sup>, Xiuxin Deng<sup>1,2,\*</sup>.

<sup>1</sup>National Key Laboratory for Germplasm Innovation & Utilization of Horticultural Crops, College of Horticulture and Forestry Sciences, Huazhong Agricultural University, Wuhan, 430070, China

<sup>2</sup>Hubei Hongshan Laboratory, Wuhan, Hubei, 430070, China

\* Corresponding author: Xiuxin Deng

Email: [xxdeng@mail.hzau.edu.cn](mailto:xxdeng@mail.hzau.edu.cn)

Tel number: +86-27-87281712

Fax number: +86-27-87281850

**Running Title:** CitCYP97B hydroxylates  $\beta$ -cryptoxanthin

## Supplemental Figures

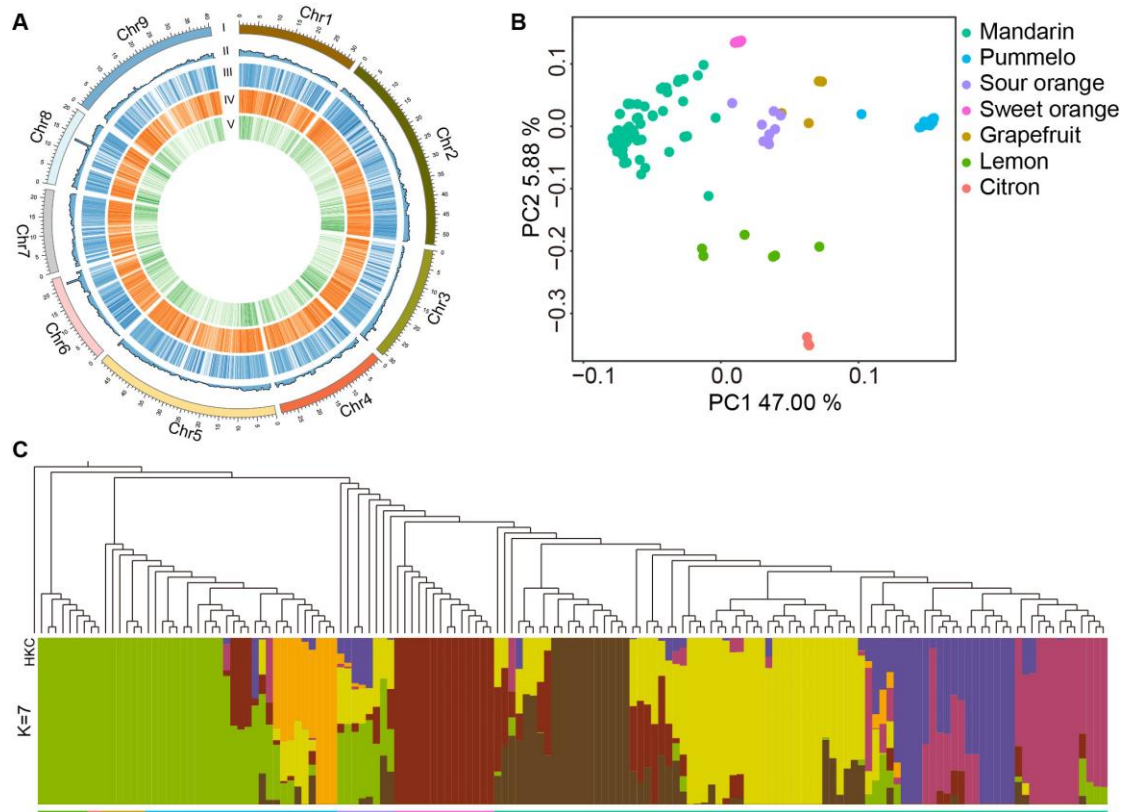

**Figure S1. Phylogenetic analysis of the 150 citrus accessions.**

Overview of the variance map (A) and population admixture analysis (B, C) of 150 citrus accessions based on the SNP dataset. (I) Chromosomes; (II) Gene density; (III) SNP density; (IV) InDel density; (V) SV density. The colored dots and lines indicate different citrus groups in the principal component analysis (B) and population admixture (C).

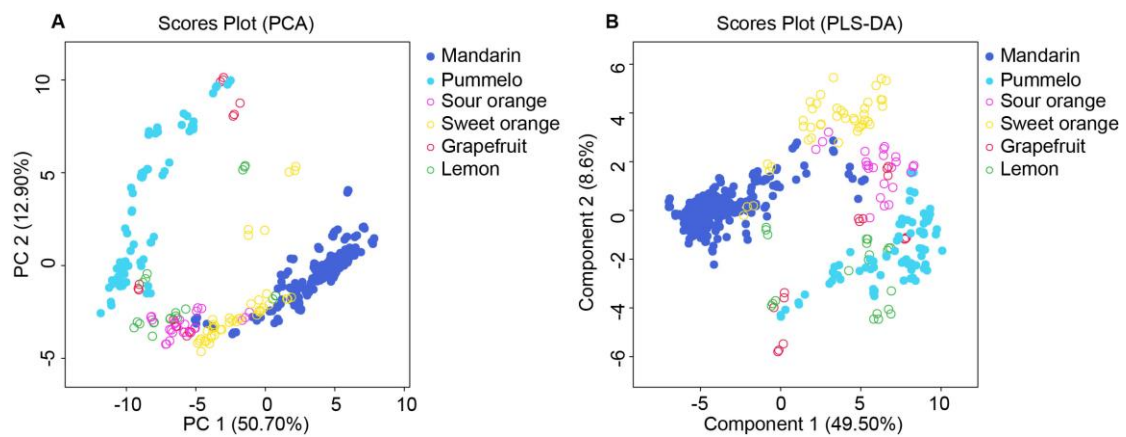

**Figure S2. Multivariate analysis of carotenoids and carotenoid derivatives.**

Principal component analysis (A) and partial least squares discriminant analysis (B) of carotenoids and carotenoid derivatives that accumulate in 148 citrus accessions.

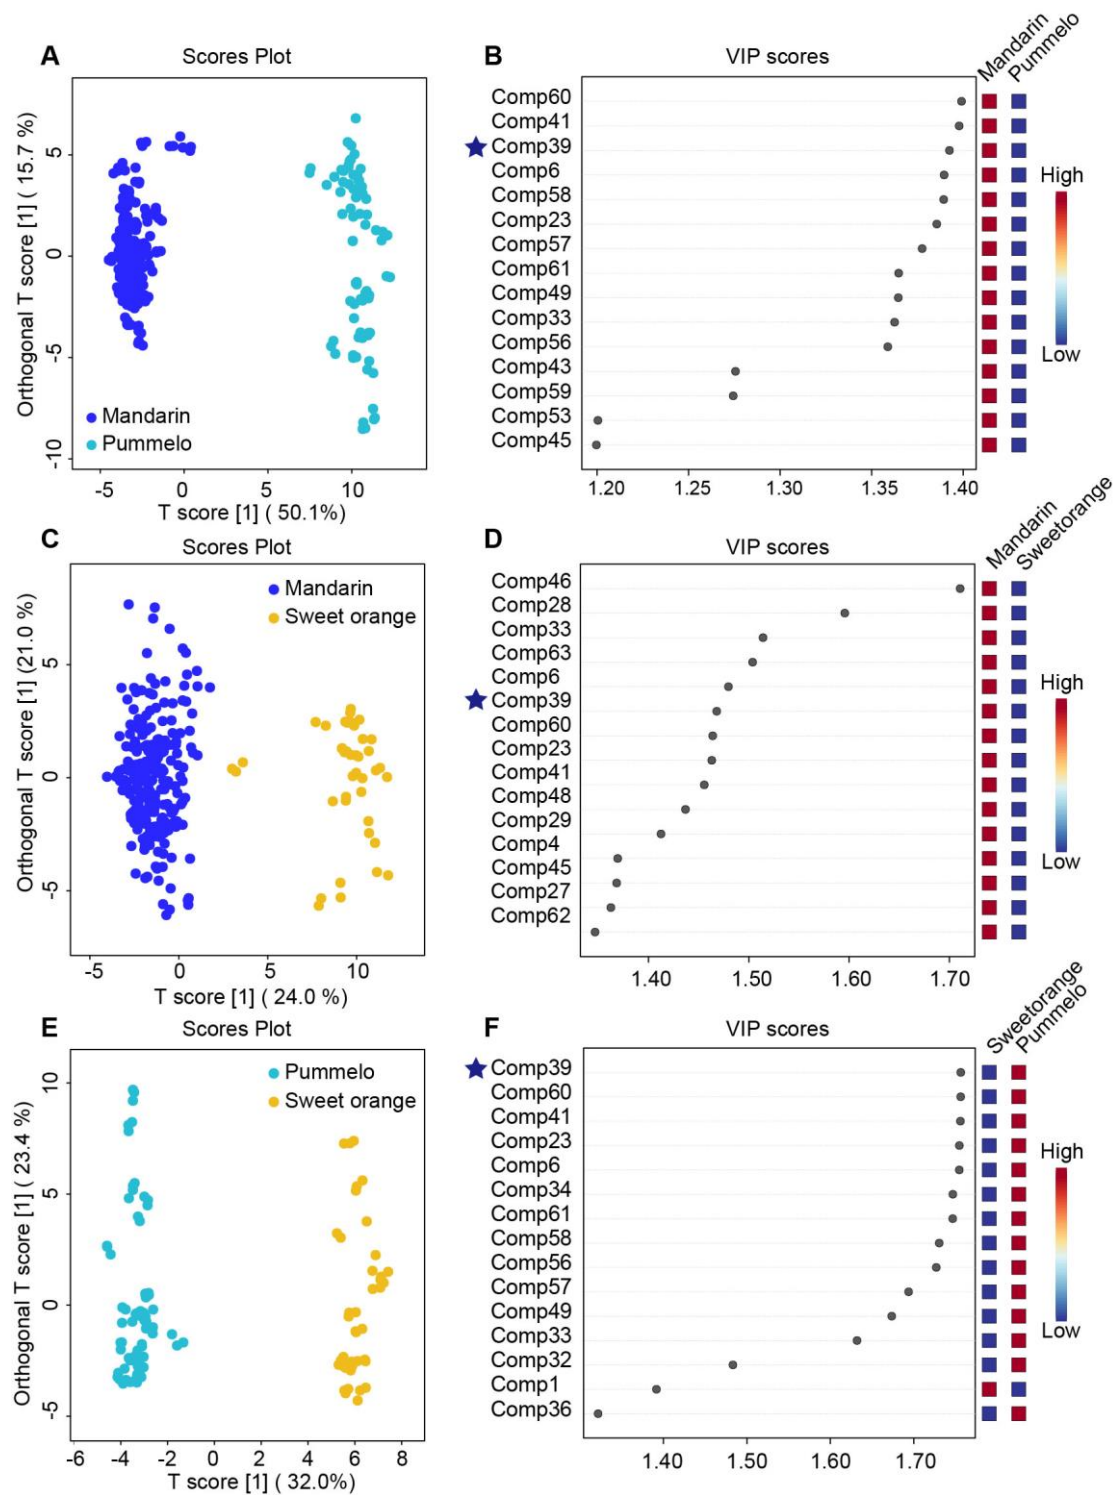

**Figure S3. Orthogonal PLS-DA of carotenoids and carotenoid derivatives among mandarin, pummelo, and sweet orange.**

Score plots (A, C, E) based on Orthogonal PLS-DA and top 15 variables (B, D, F) based on Component 1 (T score). The star indicates  $\beta$ -cryptoxanthin.

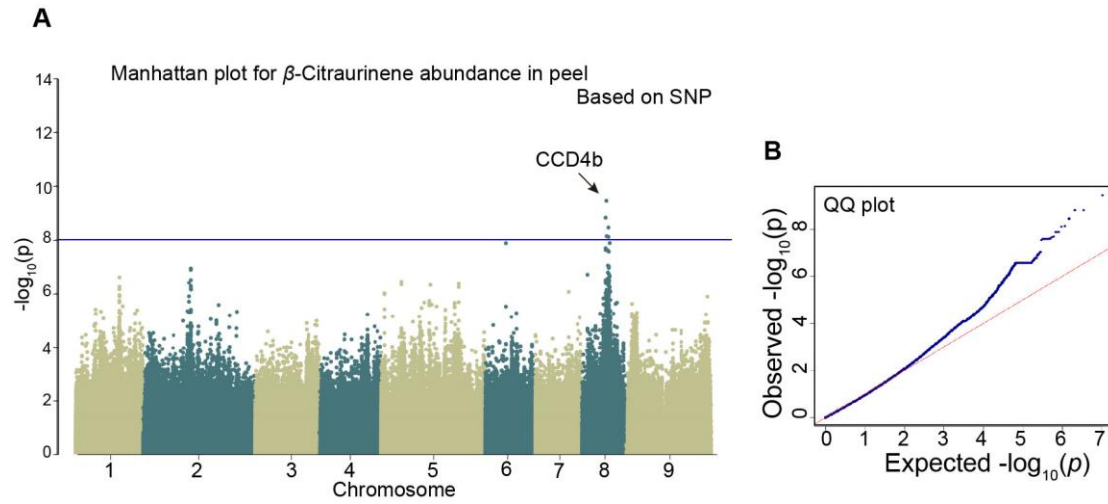

**Figure S4. Genome-wide association study for  $\beta$ -citraurine.**

Manhattan plot (A) and QQ plot (B) of  $\beta$ -citraurine abundance based on a SNP-GWAS for citrus peel.

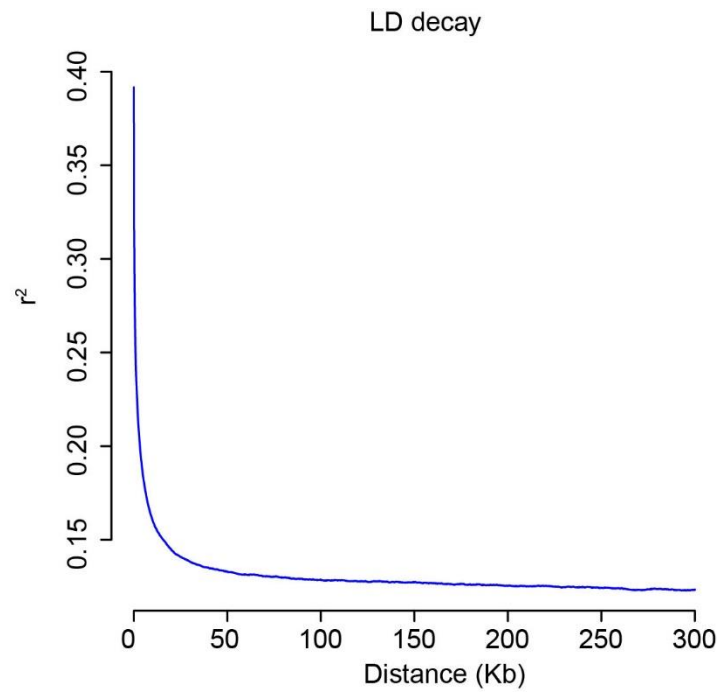

**Figure S5. Linkage disequilibrium (LD) decay in the studied population.**

LD level represented by  $r^2$  with physical distance in the whole population.

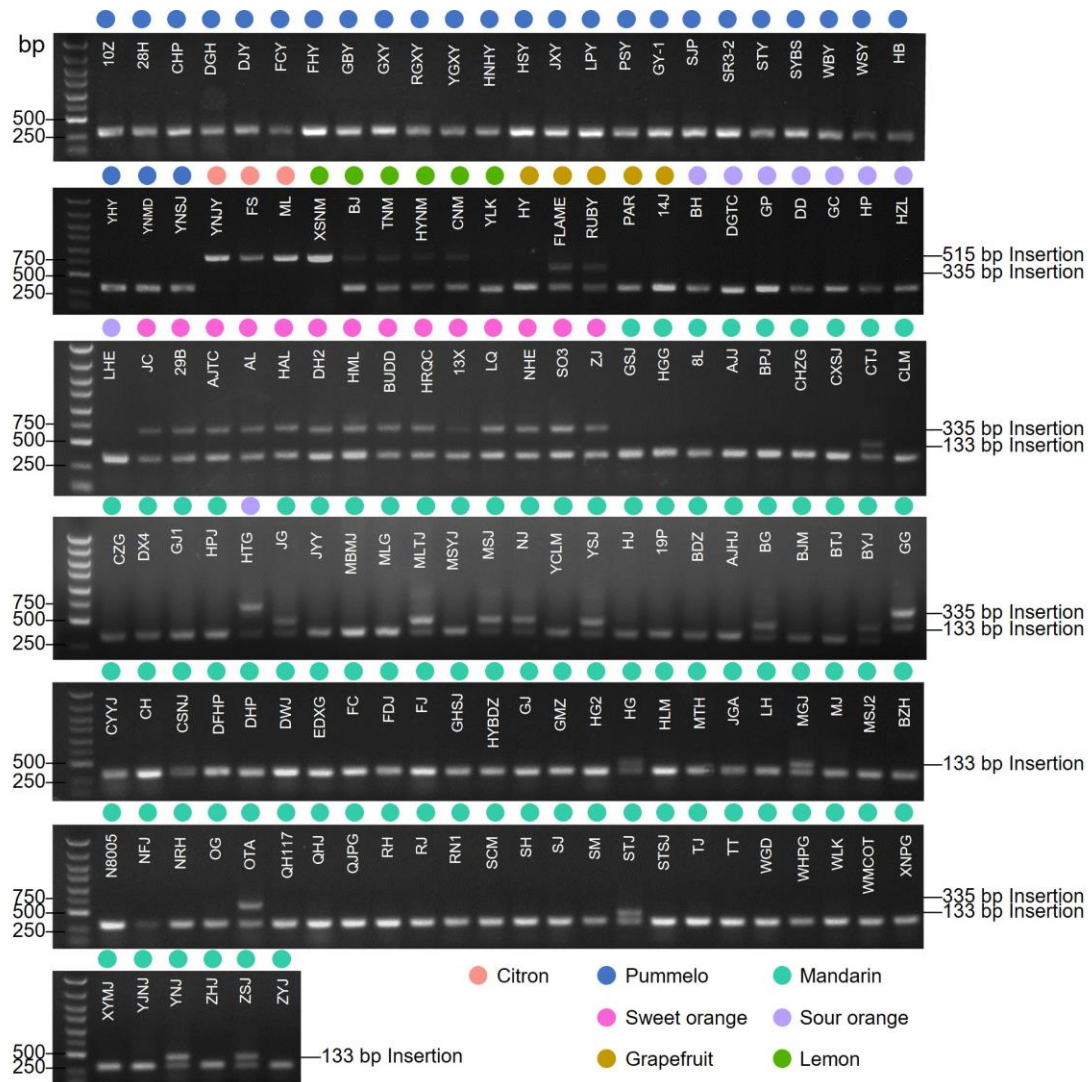

**Figure S6. Validation of structural variation using PCR-based markers.**

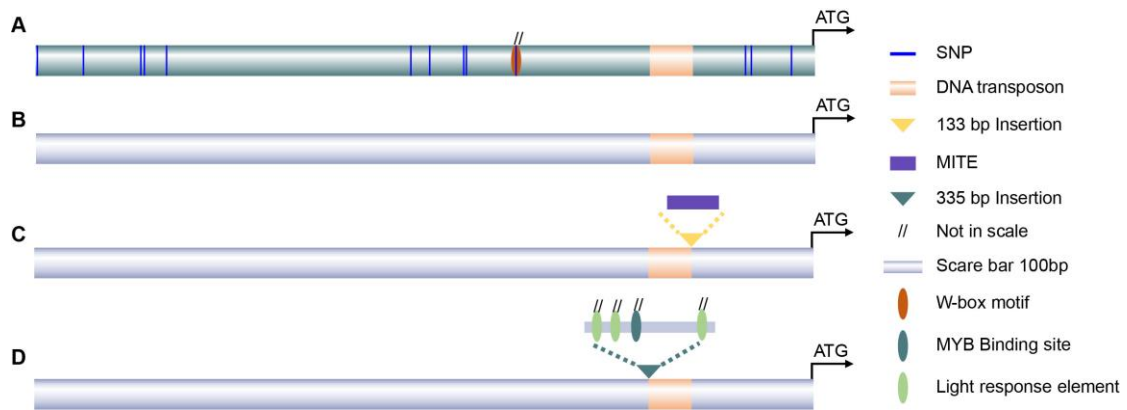

**Figure S7. Schematic of *CitCYP97B* promoter sequence variation.**

Schematic of *CitCYP97B* promoter sequence variation in Haplotype 1 (A), Haplotype 3 (B), Haplotype 4 (C), Haplotype 5 (D). The hooked arrow indicates the start site of transcription.

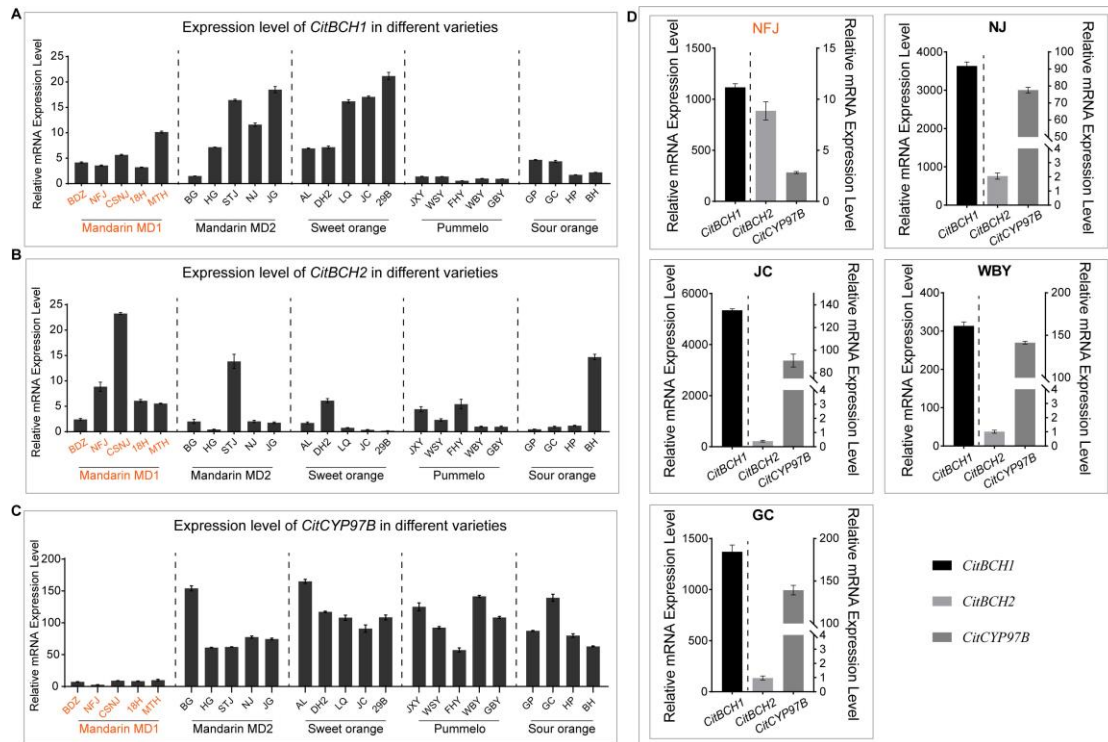

**Figure S8. The expression level of carotene hydroxylase genes in different citrus varieties.** (A) The expression levels of *CitBCH1* in the pulp of mature citrus varieties. (B) The expression levels of *CitBCH2* in the pulp of mature citrus varieties. (C) The expression levels of *CitCYP97B* in the pulp of mature citrus varieties. (D) Comparison of the expression levels of carotene hydroxylase genes in different citrus varieties. The expression level of *CitBCH1* corresponds to the left Y-axis, and both the expression levels of *CitBCH2* and *CitCYP97B* correspond to the right Y-axis. Data are presented as mean values  $\pm$  standard error in triplicate. Orange font indicates the varieties that accumulate a high proportion of  $\beta$ -cryptoxanthin.

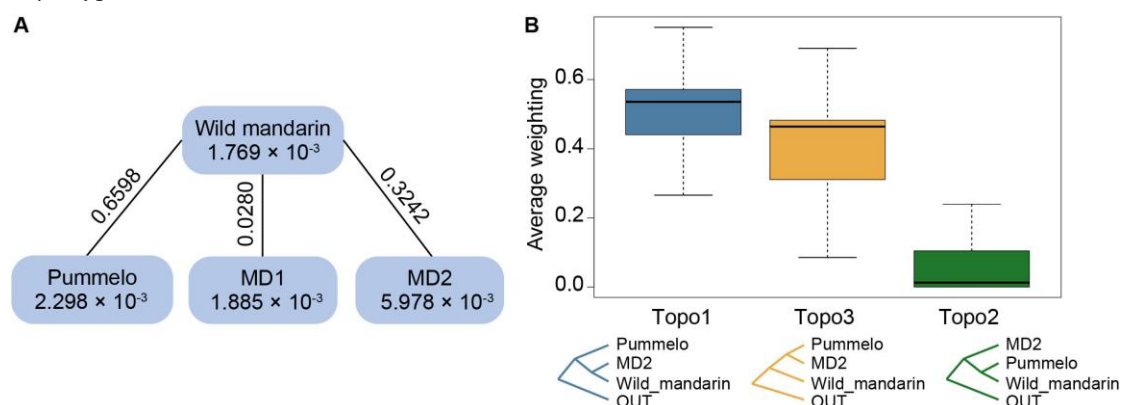

**Figure S9. Genetic diversity and introgression analysis of wild mandarin, cultivated mandarin MD2, and pummelo.** Genetic diversity and population differentiation in the window containing *CitCYP97B* (A) and topology weighting of the 1-Mb region around *CitCYP97B* in wild mandarin, cultivated mandarin MD2, and pummelo (B). Rectangles represent the genetic diversity ( $\pi$ ) of citrus groups. Lines represent  $F_{ST}$  values between citrus groups.

## Supplemental Tables

**Table S1. Information and statistics for genome sequence data of *Citrus* accessions used in this study.**

| Accession | Common name      | Scientific name          | Category                | Reads Length | Mean Coverage | GC percentage | Mean Mapping Quality | SRR id on NCBI | Source                  | Collection Source        |
|-----------|------------------|--------------------------|-------------------------|--------------|---------------|---------------|----------------------|----------------|-------------------------|--------------------------|
| 18H       | Red Tangerine    | <i>Citrus reticulata</i> | Cultivated mandarin MD1 | 125          | 33.07         | 38.96         | 38.92                | SRR3749605     | Wang et al, 2017        | Hubei Province, China    |
| 19P       | Ponkan           | <i>C. reticulata</i>     | Cultivated mandarin MD1 | 90           | 35.57         | 37.44         | 38.34                | SRR3747617     | Wang et al, 2017        | Hubei Province, China    |
| 20H       | Bendizao         | <i>C. reticulata</i>     | Cultivated mandarin MD1 | 90           | 35.50         | 37.37         | 38.64                | SRR3747635     | Wang et al, 2018        | Hubei Province, China    |
| AJHJ      | Anjianghongju    | <i>C. reticulata</i>     | Cultivated mandarin MD1 | 150          | 31.78         | 37.93         | 40.65                | SRR25409391    | sequenced in this study | Hunan Province, China    |
| BJM       | Baiju            | <i>C. reticulata</i>     | Cultivated mandarin MD1 | 150          | 36.01         | 37.90         | 40.41                | SRR25409390    | sequenced in this study | Chongqing, China         |
| CH        | Chihong          | <i>C. reticulata</i>     | Cultivated mandarin MD1 | 150          | 33.73         | 37.33         | 40.98                | SRR25409379    | sequenced in this study | Hunan Province, China    |
| CSNJ      | Changshananju    | <i>C. reticulata</i>     | Cultivated mandarin MD1 | 125          | 28.05         | 38.07         | 39.45                | SRR3747609     | Wang et al, 2018        | Chongqing, China         |
| DFHP      | Dafeng Huangpiju | <i>C. reticulata</i>     | Cultivated mandarin MD1 | 150          | 33.37         | 37.18         | 40.67                | SRR25409368    | sequenced in this study | Chongqing, China         |
| DHP       | Dahongpao        | <i>C. reticulata</i>     | Cultivated mandarin MD1 | 150          | 41.68         | 37.60         | 40.21                | SRR25409357    | sequenced in this study | Chongqing, China         |
| DWJ       | Diwangju         | <i>C. reticulata</i>     | Cultivated mandarin MD1 | 150          | 34.81         | 37.69         | 40.57                | SRR25409346    | sequenced in this study | Chongqing, China         |
| EDXG      | Edangxianggan    | <i>C. reticulata</i>     | Cultivated mandarin MD1 | 150          | 39.69         | 37.79         | 40.78                | SRR25409336    | sequenced in this study | Chongqing, China         |
| FDJ       | Fengdongju       | <i>C. reticulata</i>     | Cultivated mandarin MD1 | 150          | 34.18         | 37.73         | 40.66                | SRR25409335    | sequenced in this study | Chongqing, China         |
| FJ        | Fuju             | <i>C. reticulata</i>     | Cultivated mandarin MD1 | 150          | 35.84         | 37.74         | 40.49                | SRR25409334    | sequenced in this study | Zhejiang Province, China |



|       |                   |                      |                         |     |       |       |       |             |                         |                          |
|-------|-------------------|----------------------|-------------------------|-----|-------|-------|-------|-------------|-------------------------|--------------------------|
| GJ    | Guangju           | <i>C. reticulata</i> | Cultivated mandarin MD1 | 150 | 36.16 | 37.81 | 42.67 | SRR25409333 | sequenced in this study | Chongqing, China         |
| GJ1   | Guiju-1           | <i>C. reticulata</i> | Cultivated mandarin MD1 | 150 | 40.73 | 37.47 | 40.48 | SRR25409389 | sequenced in this study | Guangxi Province, China  |
| HG2   | Huagan-2          | <i>C. reticulata</i> | Cultivated mandarin MD1 | 150 | 42.52 | 38.63 | 40.22 | SRR25409388 | sequenced in this study | Hubei Province, China    |
| HLM   | Huanglinmiao      | <i>C. reticulata</i> | Cultivated mandarin MD1 | 150 | 36.93 | 36.99 | 40.43 | SRR25409387 | sequenced in this study | Hubei Province, China    |
| HYBDZ | Huangyan Bendizao | <i>C. reticulata</i> | Cultivated mandarin MD1 | 150 | 31.70 | 37.28 | 40.99 | SRR25409386 | sequenced in this study | Hubei Province, China    |
| JGA   | Jiangan           | <i>C. reticulata</i> | Cultivated mandarin MD1 | 125 | 32.02 | 40.65 | 39.34 | SRR5796822  | Wang et al, 2018        | Chongqing, China         |
| LH    | Liaohong          | <i>C. reticulata</i> | Cultivated mandarin MD1 | 150 | 31.41 | 36.77 | 40.66 | SRR25409385 | sequenced in this study | Zhejiang Province, China |
| MJ    | Manju             | <i>C. reticulata</i> | Cultivated mandarin MD1 | 150 | 32.43 | 37.18 | 40.75 | SRR25409384 | sequenced in this study | Zhejiang Province, China |
| MTH   | Mantouhong        | <i>C. reticulata</i> | Cultivated mandarin MD1 | 150 | 40.52 | 38.41 | 40.13 | SRR25409383 | sequenced in this study | Chongqing, China         |
| N8005 | Tiqie mandarin    | <i>C. reticulata</i> | Cultivated mandarin MD1 | 150 | 35.46 | 37.70 | 40.48 | SRR25409382 | sequenced in this study | Chongqing, China         |
| NFJ   | Nanfengmiju       | <i>C. reticulata</i> | Cultivated mandarin MD1 | 100 | 33.71 | 42.20 | 38.84 | SRR5796630  | Wang et al, 2017        | Hubei Province, China    |
| NRH   | Niurouhong        | <i>C. reticulata</i> | Cultivated mandarin MD1 | 150 | 40.07 | 38.31 | 40.27 | SRR25409381 | sequenced in this study | Guizhou Province, China  |
| OG    | Ougan             | <i>C. reticulata</i> | Cultivated mandarin MD1 | 150 | 42.02 | 38.38 | 41.13 | SRR25409380 | sequenced in this study | Chongqing, China         |
| QHJ   | Qinghongju        | <i>C. reticulata</i> | Cultivated mandarin MD1 | 150 | 35.91 | 37.71 | 40.51 | SRR25409378 | sequenced in this study | Zhejiang Province, China |
| QJPG  | Qingjiang Ponkan  | <i>C. reticulata</i> | Cultivated mandarin MD1 | 150 | 34.65 | 37.51 | 40.61 | SRR25409377 | sequenced in this study | Hubei Province, China    |

|      |                  |                      |                         |     |       |       |       |             |                         |                           |
|------|------------------|----------------------|-------------------------|-----|-------|-------|-------|-------------|-------------------------|---------------------------|
| RH   | Sunki            | <i>C. reticulata</i> | Cultivated mandarin MD1 | 150 | 39.53 | 37.76 | 41.21 | SRR25409376 | sequenced in this study | Hubei Province, China     |
| RJ   | Ruju             | <i>C. reticulata</i> | Cultivated mandarin MD1 | 150 | 40.99 | 37.21 | 40.32 | SRR25409375 | sequenced in this study | Chongqing, China          |
| SH   | Suhong           | <i>C. reticulata</i> | Cultivated mandarin MD1 | 150 | 33.17 | 37.39 | 42.19 | SRR25409374 | sequenced in this study | Chongqing, China          |
| TJ   | Tu mandarin      | <i>C. reticulata</i> | Cultivated mandarin MD1 | 150 | 34.76 | 37.32 | 41.08 | SRR25409373 | sequenced in this study | Chongqing, China          |
| TT   | Taitian Ponkan   | <i>C. reticulata</i> | Cultivated mandarin MD1 | 150 | 32.60 | 37.71 | 40.53 | SRR25409372 | sequenced in this study | Hubei Province, China     |
| WGD  | Wuganda mandairn | <i>C. reticulata</i> | Cultivated mandarin MD1 | 150 | 33.65 | 38.14 | 40.26 | SRR25409371 | sequenced in this study | Chongqing, China          |
| WHPG | Seedless Ponkan  | <i>C. reticulata</i> | Cultivated mandarin MD1 | 125 | 26.05 | 38.34 | 39.25 | SRR5796644  | Wang et al, 2018        | Chongqing, China          |
| XNPG | Xinnv Ponkan     | <i>C. reticulata</i> | Cultivated mandarin MD1 | 150 | 35.08 | 37.53 | 40.62 | SRR25409370 | sequenced in this study | Hubei Province, China     |
| XYMJ | Xinyumiju        | <i>C. reticulata</i> | Cultivated mandarin MD1 | 150 | 33.63 | 36.97 | 40.89 | SRR25409369 | sequenced in this study | Jiangxi Province, China   |
| YJNJ | Yuanjiangnanju   | <i>C. reticulata</i> | Cultivated mandarin MD1 | 125 | 30.64 | 36.69 | 39.76 | SRR5796865  | Wang et al, 2018        | Hunan Province, China     |
| ZHJ  | Zhuhongju        | <i>C. reticulata</i> | Cultivated mandarin MD1 | 125 | 27.61 | 40.60 | 38.88 | SRR5796927  | Wang et al, 2018        | Chongqing, China          |
| BG   | Biangan          | <i>C. reticulata</i> | Cultivated mandarin MD2 | 150 | 33.87 | 37.74 | 40.91 | SRR25409367 | sequenced in this study | Chongqing, China          |
| BTJ  | Bingtangju       | <i>C. reticulata</i> | Cultivated mandarin MD2 | 125 | 30.36 | 37.90 | 39.68 | SRR3756893  | Wang et al, 2017        | Hubei Province, China     |
| BYJ  | Bayueju          | <i>C. reticulata</i> | Cultivated mandarin MD2 | 150 | 38.95 | 38.65 | 40.19 | SRR25409366 | sequenced in this study | Guangdong Province, China |
| CTJ  | Chutianju        | <i>C. reticulata</i> | Cultivated mandarin MD2 | 150 | 34.15 | 37.10 | 40.55 | SRR25409365 | sequenced in this study | Guangdong Province, China |

|      |                   |                      |                         |     |        |       |       |             |                         |                           |
|------|-------------------|----------------------|-------------------------|-----|--------|-------|-------|-------------|-------------------------|---------------------------|
| CZG  | Chachigan         | <i>C. reticulata</i> | Cultivated mandarin MD2 | 125 | 28.83  | 38.03 | 39.22 | SRR3747583  | Wang et al, 2018        | Chongqing, China          |
| HG   | Hanggan           | <i>C. reticulata</i> | Cultivated mandarin MD2 | 150 | 41.51  | 38.56 | 40.56 | SRR25409364 | sequenced in this study | Guangdong Province, China |
| MGJ  | Manguju           | <i>C. reticulata</i> | Cultivated mandarin MD2 | 150 | 35.31  | 38.36 | 40.65 | SRR25409363 | sequenced in this study | Chongqing, China          |
| MLTJ | Mingliutianju     | <i>C. reticulata</i> | Cultivated mandarin MD2 | 125 | 24.97  | 38.69 | 39.24 | SRR3750679  | Wang et al, 2018        | Guangdong Province, China |
| MSJ  | Mashuiju          | <i>C. reticulata</i> | Cultivated mandarin MD2 | 125 | 26.37  | 38.89 | 39.20 | SRR3751832  | Wang et al, 2017        | Hubei Province, China     |
| NJ   | Nianju            | <i>C. reticulata</i> | Cultivated mandarin MD2 | 125 | 30.77  | 38.06 | 39.04 | SRR3750668  | Wang et al, 2018        | Chongqing, China          |
| STJ  | Shatangju         | <i>C. reticulata</i> | Cultivated mandarin MD2 | 125 | 30.33  | 39.51 | 38.73 | SRR3756933  | Wang et al, 2018        | Chongqing, China          |
| YNJ  | Vietnamju         | <i>C. reticulata</i> | Cultivated mandarin MD2 | 150 | 36.52  | 37.75 | 40.90 | SRR25409362 | sequenced in this study | Chongqing, China          |
| YSJ  | Yangshan mandarin | <i>C. reticulata</i> | Cultivated mandarin MD2 | 125 | 32.29  | 37.81 | 39.55 | SRR3750648  | Wang et al, 2018        | Guangdong Province, China |
| ZSJ  | Zhushaju          | <i>C. reticulata</i> | Cultivated mandarin MD2 | 150 | 39.68  | 37.61 | 40.27 | SRR25409361 | sequenced in this study | Chongqing, China          |
| AJJ  | Aijiju            | <i>C. reticulata</i> | Mandarin hybrid         | 150 | 36.50  | 37.43 | 40.61 | SRR25409360 | sequenced in this study | Chongqing, China          |
| BZH  | Buzhihuo          | <i>C. reticulata</i> | Mandarin hybrid         | 150 | 18.67  | 36.83 | 41.81 | SRR25409359 | sequenced in this study | Hubei Province, China     |
| CLM  | Clementin         | <i>C. reticulata</i> | Mandarin hybrid         | 100 | 117.39 | 35.05 | 40.52 | SRR5807898  | Wu et al, 2018          | Hubei Province, China     |
| FC   | Fairchild         | <i>C. reticulata</i> | Mandarin hybrid         | 150 | 36.80  | 37.42 | 41.14 | SRR25409358 | sequenced in this study | Chongqing, China          |
| GG   | Gonggan           | <i>C. reticulata</i> | Mandarin hybrid         | 150 | 35.27  | 37.91 | 41.68 | SRR25409356 | sequenced in this study | Guangxi Province, China   |

|       |                       |                      |                       |     |       |       |       |             |                         |                         |
|-------|-----------------------|----------------------|-----------------------|-----|-------|-------|-------|-------------|-------------------------|-------------------------|
| JG    | Jiaogan               | <i>C. reticulata</i> | Mandarin hybrid       | 150 | 42.49 | 38.04 | 41.50 | SRR25409355 | sequenced in this study | Chongqing, China        |
| MLG   | Moluogesianju         | <i>C. reticulata</i> | Mandarin hybrid       | 150 | 33.22 | 37.81 | 41.09 | SRR25409354 | sequenced in this study | Chongqing, China        |
| Ota   | Ortanique tangor      | <i>C. reticulata</i> | Mandarin hybrid       | 150 | 37.19 | 37.51 | 41.79 | SRR25409353 | sequenced in this study | Hubei Province, China   |
| QH117 | Qihui                 | <i>C. reticulata</i> | Mandarin hybrid       | 150 | 39.48 | 37.62 | 40.12 | SRR3822244  | Wang et al, 2017        | Hubei Province, China   |
| SM    | Satsuma Mandarin      | <i>C. unshiu</i>     | Mandarin hybrid       | 90  | 38.77 | 36.97 | 39.99 | SRR5807909  | Wang et al, 2018        | Hubei Province, China   |
| GMZ   | Guangmingzao          | <i>C. unshiu</i>     | Mandarin hybrid       | 150 | 34.05 | 37.22 | 41.98 | SRR25409352 | sequenced in this study | Hubei Province, China   |
| RN1   | Rinan-1 Satsuma       | <i>C. unshiu</i>     | Mandarin hybrid       | 150 | 38.81 | 36.95 | 42.05 | SRR25409351 | sequenced in this study | Hubei Province, China   |
| WLK   | Wilking               | <i>C. reticulata</i> | Mandarin hybrid       | 100 | 26.47 | 38.69 | 38.97 | SRR3820551  | Wang et al, 2017        | Hubei Province, China   |
| WMCot | W-Mcot                | <i>C. reticulata</i> | Mandarin hybrid       | 150 | 38.52 | 38.20 | 41.07 | SRR25409350 | sequenced in this study | Hubei Province, China   |
| YCLM  | MA-10                 | <i>C. reticulata</i> | Mandarin hybrid       | 150 | 42.23 | 37.85 | 40.34 | SRR25409349 | sequenced in this study | Hubei Province, China   |
| ZYJ   | Zhuanyouju            | <i>C. reticulata</i> | Mandarin hybrid       | 150 | 31.41 | 38.39 | 41.04 | SRR25409348 | sequenced in this study | Chongqing, China        |
| HGG   | Huangguogan           | <i>C. reticulata</i> | Mandarin hybrid       | 150 | 44.47 | 38.06 | 42.89 | SRR25409347 | sequenced in this study | Chongqing, China        |
| HPJ   | Daoxian huapi         | <i>C. reticulata</i> | domesticated mandarin | 100 | 21.76 | 38.22 | 38.19 | SRR3750611  | Wang et al, 2017        | Hubei Province, China   |
| 8L    | Tachibana Mandarin    | <i>C. reticulata</i> | Wild mandarin         | 90  | 35.86 | 39.30 | 38.18 | SRR3747335  | Wang et al, 2017        | Chongqing, China        |
| CYY   | Chongyi wild mandarin | <i>C. reticulata</i> | Wild mandarin         | 100 | 22.72 | 36.87 | 38.67 | SRR3747399  | Wang et al, 2017        | Jiangxi Province, China |

|       |                         |                      |                       |     |       |       |       |             |                         |                           |
|-------|-------------------------|----------------------|-----------------------|-----|-------|-------|-------|-------------|-------------------------|---------------------------|
| DX4   | Daoxian wild mandarin   | <i>C. reticulata</i> | Wild mandarin         | 90  | 35.50 | 37.57 | 38.47 | SRR5796645  | Wang et al, 2018        | Hubei Province, China     |
| JYY   | Jiangyong wild mandarin | <i>C. reticulata</i> | Wild mandarin         | 150 | 44.88 | 37.07 | 40.63 | SRR5796862  | Wang et al, 2018        | Hubei Province, China     |
| MS1   | Mangshan wild mandarin  | <i>C. reticulata</i> | Wild mandarin         | 90  | 35.21 | 37.72 | 38.41 | SRR5796818  | Wang et al, 2018        | Hubei Province, China     |
| BPJ   | Bianpingju              | <i>C. reticulata</i> | Mandarin unclassified | 150 | 41.65 | 37.73 | 40.25 | SRR25409345 | sequenced in this study | Chongqing, China          |
| CX SJ | Cengxisuanju            | <i>C. reticulata</i> | Mandarin unclassified | 150 | 36.91 | 37.37 | 40.56 | SRR25409344 | sequenced in this study | Guangxi Province, China   |
| GHSJ  | Guihusuanju             | <i>C. reticulata</i> | Mandarin unclassified | 150 | 41.08 | 38.47 | 40.05 | SRR25409343 | sequenced in this study | Guangdong Province, China |
| MBMJ  | Mabimiju                | <i>C. reticulata</i> | Mandarin unclassified | 150 | 35.20 | 37.63 | 40.34 | SRR25409342 | sequenced in this study | Chongqing, China          |
| MSJ2  | Mashiju                 | <i>C. reticulata</i> | Mandarin unclassified | 150 | 31.33 | 37.57 | 40.43 | SRR25409341 | sequenced in this study | Chongqing, China          |
| SCM   | Sun Chu Sha Kat         | <i>C. reticulata</i> | Mandarin unclassified | 100 | 39.43 | 35.38 | 39.39 | SRR6188448  | Wu et al, 2018          | Chongqing, China          |
| SJ    | Suanju                  | <i>C. reticulata</i> | Mandarin unclassified | 150 | 35.36 | 37.44 | 40.36 | SRR25409340 | sequenced in this study | Chongqing, China          |
| STSJ  | Shantousuanju           | <i>C. reticulata</i> | Mandarin unclassified | 150 | 36.10 | 37.65 | 40.44 | SRR25409339 | sequenced in this study | Chongqing, China          |
| CHZG  | Chaozhougan             | <i>C. reticulata</i> | Mandarin unclassified | 150 | 30.94 | 37.65 | 40.58 | SRR25409338 | sequenced in this study | Chongqing, China          |
| GSJ   | Gongsunju               | <i>C. reticulata</i> | Mandarin unclassified | 150 | 31.81 | 37.64 | 40.93 | SRR25409337 | sequenced in this study | Hunan Province, China     |
| 10Z   | Zipi Pummelo            | <i>C. maxima</i>     | Pummelo               | 90  | 32.18 | 37.34 | 43.75 | SRR3823645  | Wang et al, 2017        | Hubei Province, China     |
| 28H   | Huazhoujuhong           | <i>C. maxima</i>     | Pummelo               | 90  | 37.74 | 37.53 | 43.52 | SRR3823225  | Wang et al, 2017        | Guangxi Province, China   |

|      |                       |                  |         |     |       |       |       |             |                         |                          |
|------|-----------------------|------------------|---------|-----|-------|-------|-------|-------------|-------------------------|--------------------------|
| CHP  | Chandler              | <i>C. maxima</i> | Pummelo | 100 | 26.11 | 36.30 | 44.64 | SRR1023627  | Wu et al, 2014          | Hubei Province, China    |
| DGH  | Daguohong Pummelo     | <i>C. maxima</i> | Pummelo | 150 | 34.38 | 37.77 | 45.99 | SRR25409048 | sequenced in this study | Hunan Province, China    |
| DJY  | Dianjiang red Pummelo | <i>C. maxima</i> | Pummelo | 150 | 42.12 | 38.91 | 45.77 | SRR25409047 | sequenced in this study | Chongqing, China         |
| FCY  | Feicui Pummelo        | <i>C. maxima</i> | Pummelo | 150 | 43.54 | 39.06 | 45.91 | SRR25409044 | sequenced in this study | Zhejiang Province, China |
| FHY  | Fenghuang Pummelo     | <i>C. maxima</i> | Pummelo | 150 | 33.78 | 37.20 | 48.28 | SRR25409043 | sequenced in this study | Hubei Province, China    |
| GBY  | Kaopan Pummelo        | <i>C. maxima</i> | Pummelo | 125 | 29.04 | 37.66 | 45.72 | SRR3823447  | Wang et al, 2017        | Chongqing, China         |
| GXY  | Guanximi Pummelo      | <i>C. maxima</i> | Pummelo | 90  | 37.74 | 37.52 | 43.84 | SRR5802549  | Wang et al, 2018        | Chongqing, China         |
| GY-1 | Gui-1 Pummelo         | <i>C. maxima</i> | Pummelo | 150 | 40.03 | 37.32 | 46.32 |             | Liang et al, 2020       | Guangxi Province, China  |
| HB   | HB Pummelo            | <i>C. maxima</i> | Pummelo | 150 | 41.83 | 37.34 | 46.03 | SRR9127779  | Liang et al, 2020       | Hubei Province, China    |
| HNHY | Huanonghong Pummelo   | <i>C. maxima</i> | Pummelo | 125 | 30.31 | 37.62 | 45.13 | SRR3823230  | Wang et al, 2017        | Hubei Province, China    |
| HSY  | Suan hongrou Pummelo  | <i>C. maxima</i> | Pummelo | 150 | 34.84 | 37.85 | 46.09 | SRR25409042 | sequenced in this study | Guangxi Province, China  |
| JXY  | Jinxiang Pummelo      | <i>C. maxima</i> | Pummelo | 150 | 45.74 | 38.51 | 44.46 | SRR25409041 | sequenced in this study | Chongqing, China         |
| LPY  | Liangping Pummelo     | <i>C. maxima</i> | Pummelo | 150 | 33.24 | 37.35 | 48.23 | SRR25409040 | sequenced in this study | Chongqing, China         |
| PSY  | Pingshan Pummelo      | <i>C. maxima</i> | Pummelo | 150 | 38.80 | 37.36 | 46.14 | SRR25409039 | sequenced in this study | Chongqing, China         |
| RGXY | Red Guanxi Pummelo    | <i>C. maxima</i> | Pummelo | 150 | 44.77 | 38.42 | 45.75 | SRR25409038 | sequenced in this study | Chongqing, China         |
| SJP  | Sijipao Pummelo       | <i>C. maxima</i> | Pummelo | 150 | 36.63 | 37.54 | 45.97 | SRR25409037 | sequenced in this study | Chongqing, China         |

|       |                        |                     |             |     |       |       |       |             |                         |                         |
|-------|------------------------|---------------------|-------------|-----|-------|-------|-------|-------------|-------------------------|-------------------------|
| SR3-2 | Majia Pummelo          | <i>C. maxima</i>    | Pummelo     | 125 | 28.15 | 37.94 | 44.88 | SRR3822290  | Wang et al, 2017        | Jiangxi Province, China |
| STY   | Shatian Pummelo        | <i>C. maxima</i>    | Pummelo     | 100 | 35.06 | 44.43 | 42.86 | SRR5796631  | Wang et al, 2017        | Chongqing, China        |
| SYBS  | Suanyou In Baishazhen  | <i>C. maxima</i>    | Pummelo     | 125 | 30.24 | 38.27 | 45.04 | SRR3844987  | Wang et al, 2017        | Guangxi Province, China |
| WBY   | Wanbai Pummelo         | <i>C. maxima</i>    | Pummelo     | 125 | 34.11 | 38.06 | 45.01 | SRR3823251  | Wang et al, 2017        | Chongqing, China        |
| WSY   | Acidless Pummelo       | <i>C. maxima</i>    | Pummelo     | 100 | 32.37 | 42.26 | 43.53 | SRR5796633  | Wang et al, 2017        | Hubei Province, China   |
| YGXY  | Yellow Guanxi Pummelo  | <i>C. maxima</i>    | Pummelo     | 150 | 43.82 | 38.16 | 45.88 | SRR25409046 | sequenced in this study | Chongqing, China        |
| YHY   | Yuhuan Pummelo         | <i>C. maxima</i>    | Pummelo     | 150 | 38.72 | 37.55 | 46.41 | SRR25409045 | sequenced in this study | Chongqing, China        |
| YNMD  | Yunnanmiandian         | <i>C. maxima</i>    | Pummelo     | 150 | 28.86 | 36.65 | 46.16 |             | Liang et al, 2020       | Yunnan Province, China  |
| YNSJ  | Yunnanshuijing Pummelo | <i>C. maxima</i>    | Pummelo     | 150 | 47.39 | 38.02 | 47.31 | SRR9127776  | Liang et al, 2020       | Yunnan Province, China  |
| HP    | Huangpi Sour orange    | <i>C. aurantium</i> | Sour orange | 150 | 21.38 | 39.32 | 40.29 | SRR25394378 | sequenced in this study | Chongqing, China        |
| BH    | Bianhong lemon         | <i>C. aurantium</i> | Sour orange | 150 | 27.30 | 37.67 | 43.09 | SRR9127844  | Liang et al, 2020       | Chongqing, China        |
| DD    | Daidai                 | <i>C. aurantium</i> | Sour orange | 90  | 36.77 | 37.64 | 40.89 | SRR3885049  | Wang et al, 2017        | Hubei Province, China   |
| DGTC  | Dagoutoucheng          | <i>C. aurantium</i> | Sour orange | 150 | 18.59 | 36.83 | 43.05 | SRR9127839  | Liang et al, 2020       | Chongqing, China        |
| GC    | Gaocheng               | <i>C. aurantium</i> | Sour orange | 150 | 20.87 | 36.37 | 43.33 | SRR25394377 | sequenced in this study | Chongqing, China        |
| GP    | Guangpi Sour orange    | <i>C. aurantium</i> | Sour orange | 150 | 28.54 | 38.06 | 42.67 | SRR9127856  | Liang et al, 2020       | Chongqing, China        |
| HTG   | Hutougan               | <i>C. aurantium</i> | Sour orange | 150 | 48.37 | 37.56 | 42.22 | SRR25394376 | sequenced in this study | Hubei Province, China   |
| HZL   | Zhuluanhongguo         | <i>C. aurantium</i> | Sour orange | 150 | 28.00 | 37.87 | 42.45 | SRR9127851  | Liang et al, 2020       | Chongqing, China        |
| LHE   | Lianhe Sour orange     | <i>C. aurantium</i> | Sour orange | 150 | 32.60 | 37.56 | 43.20 | SRR25394375 | sequenced in this study | Chongqing, China        |

|      |                        |                    |              |     |       |       |       |             |                         |                        |
|------|------------------------|--------------------|--------------|-----|-------|-------|-------|-------------|-------------------------|------------------------|
| 13X  | Blood Orange           | <i>C. sinensis</i> | Sweet orange | 90  | 29.85 | 37.06 | 40.35 | SRR3884813  | Wang et al, 2017        | Chongqing, China       |
| 29B  | Bingtangcheng          | <i>C. sinensis</i> | Sweet orange | 90  | 36.34 | 39.77 | 39.84 | SRR3926732  | Wang et al, 2017        | Chongqing, China       |
| AJTC | Succari                | <i>C. sinensis</i> | Sweet orange | 150 | 44.09 | 37.34 | 42.49 | SRR10321654 | Wang et al, 2021        | Chongqing, China       |
| AL   | Anliu Sweet orange     | <i>C. sinensis</i> | Sweet orange | 125 | 30.69 | 38.44 | 41.14 | SRR3883626  | Wang et al, 2017        | Hubei Province, China  |
| BuDD | BuDD blood orange      | <i>C. sinensis</i> | Sweet orange | 150 | 43.50 | 38.22 | 42.32 | SRR25408882 | sequenced in this study | Hubei Province, China  |
| DH2  | Dahongtiancheng        | <i>C. sinensis</i> | Sweet orange | 125 | 35.70 | 39.33 | 41.07 | SRR5801193  | Wang et al, 2021        | Chongqing, China       |
| HAL  | Honganliu              | <i>C. sinensis</i> | Sweet orange | 150 | 46.99 | 41.09 | 41.91 | SRR5801703  | Wang et al, 2021        | Hubei Province, China  |
| HML  | Hamlin Sweet orange    | <i>C. sinensis</i> | Sweet orange | 125 | 26.22 | 40.72 | 40.49 | SRR3883647  | Wang et al, 2017        | Chongqing, China       |
| HRQC | Caracara               | <i>C. sinensis</i> | Sweet orange | 150 | 53.48 | 41.49 | 41.91 | SRR5801917  | Wang et al, 2021        | Hubei Province, China  |
| JC   | Jincheng               | <i>C. sinensis</i> | Sweet orange | 125 | 29.53 | 37.57 | 41.55 | SRR3884491  | Wang et al, 2017        | Hubei Province, China  |
| LQ   | Robertson navel orange | <i>C. sinensis</i> | Sweet orange | 90  | 35.76 | 36.88 | 40.43 | SRR3884773  | Wang et al, 2017        | Chongqing, China       |
| NHE  | Newhall navel orange   | <i>C. sinensis</i> | Sweet orange | 150 | 38.29 | 37.10 | 41.94 | SRR3927459  | Wang et al, 2017        | Hubei Province, China  |
| SO3  | Valencia Orange        | <i>C. sinensis</i> | Sweet orange | 90  | 55.46 | 37.34 | 40.37 | SRR5799051  | Wang et al, 2017        | Hubei Province, China  |
| ZJ   | Zaojin Sweet orange    | <i>C. sinensis</i> | Sweet orange | 150 | 50.38 | 38.70 | 42.15 | SRR25408881 | sequenced in this study | Hubei Province, China  |
| FS   | Buddha'S Hand          | <i>C. medica</i>   | Citron       | 100 | 29.03 | 37.65 | 35.81 | SRR3948163  | Wang et al, 2017        | Hubei Province, China  |
| JY   | Citron                 | <i>C. medica</i>   | Citron       | 90  | 35.90 | 37.21 | 35.83 | SRR3938734  | Wang et al, 2017        | Yunnan Province, China |
| 14J  | Coctail Grapefruit     | <i>C. maxima</i>   | Grapefruit   | 90  | 36.39 | 36.91 | 41.30 | SRR3926757  | Wang et al, 2017        | Hubei Province, China  |



|       |                      |                  |            |     |        |       |       |             |                          |                           |
|-------|----------------------|------------------|------------|-----|--------|-------|-------|-------------|--------------------------|---------------------------|
| Flame | Flame grapefruit     | <i>C. maxima</i> | Grapefruit | 100 | 28.82  | 41.40 | 41.37 | SRR3927405  | Wang et al, 2017         | Hubei Province, China     |
| HY    | Huyou                | <i>C. maxima</i> | Grapefruit | 150 | 28.55  | 38.77 | 42.03 | SRR25609456 | Data waiting for release | Chongqing, China          |
| PAR   | Marsh grapefruit     | <i>C. maxima</i> | Grapefruit | 100 | 107.26 | 32.25 | 43.40 | SRR6188447  | Wu et al, 2018           | Hubei Province, China     |
| Ruby  | Star Ruby grapefruit | <i>C. maxima</i> | Grapefruit | 100 | 30.81  | 39.49 | 41.94 | SRR3927447  | Wang et al, 2017         | Hubei Province, China     |
| BJ    | Beijing lemon        | <i>C. limon</i>  | Lemon      | 150 | 37.01  | 37.65 | 39.60 |             | Liang et al, 2020        | Yunnan Province, China    |
| CNM   | Rough lemon          | <i>C. limon</i>  | Lemon      | 150 | 46.47  | 38.13 | 38.68 | SRR25409056 | sequenced in this study  | Hubei Province, China     |
| HYNM  | Huaye lemon          | <i>C. limon</i>  | Lemon      | 150 | 50.45  | 38.55 | 39.92 | SRR25409055 | sequenced in this study  | Hubei Province, China     |
| ML    | Muli                 | <i>C. limon</i>  | Lemon      | 90  | 35.82  | 37.04 | 38.63 |             | Liang et al, 2020        | Chongqing, China          |
| TNM   | Tu lemon             | <i>C. limon</i>  | Lemon      | 150 | 35.61  | 36.85 | 39.00 | SRR25409054 | sequenced in this study  | Guangdong Province, China |
| XSNM  | Xiangshui lemon      | <i>C. limon</i>  | Lemon      | 150 | 33.16  | 37.33 | 38.22 | SRR25409053 | sequenced in this study  | Yunnan Province, China    |
| YLK   | Eureka Lemon         | <i>C. limon</i>  | Lemon      | 125 | 34.63  | 40.58 | 38.45 | SRR3952134  | Wang et al, 2017         | Hubei Province, China     |

Reference:

1. Wu, G. A. et al. (2014). Sequencing of diverse mandarin, pummelo and orange genomes reveals complex history of admixture during citrus domestication. *Nature Biotechnology* 32, 656.
2. Wang, X. et al. (2017). Genomic analyses of primitive, wild and cultivated citrus provide insights into asexual reproduction. *Nature Genetic* 49:765–772.
3. Wu, G. A. et al. (2018). GenomiCit of the origin and evolution of Citrus. *Nature* 554:311–316.
4. Wang, L. et al. (2018). Genome of wild mandarin and domestication history of mandarin. *Molecular Plant* 11:1024–1037.
5. Liang, M. et al. (2020). Evolution of self-compatibility by a mutant Sm-RNase in citrus. *Nature Plants* 6:131–142.
6. Wang, L. et al. (2021). Somatic variations led to the selection of acidic and acidless orange cultivars. *Nature Plants* 7:954-965.

**Table S2. Information on carotenoids and carotenoid derivatives.**

| No.    | Putative component name                                                         | Level <sup>a</sup> |
|--------|---------------------------------------------------------------------------------|--------------------|
| Comp1  | (11cis,13cis,13'cis)-1,2,7,7',8,8',11',12'-Octahydro-1,2-epoxy-psi,psi-carotene | B                  |
| Comp2  | 1,2,7,7',8,8',11',12'-Octahydro-psi,psi-caroten-1-ol-isomer                     | B                  |
| Comp3  | 10'-Apo- $\beta$ -carotene-isomer2                                              | B                  |
| Comp4  | 1-Methoxy-1,2,7',8',11',12'-hexahydro-psi,psi-carotene                          | B                  |
| Comp5  | 3'-Hydroxyechinenone/3'-OH-Echinenone                                           | B                  |
| Comp6  | 3'-Hydroxyechinenone/3'-OH-Echinenone-isomer                                    | B                  |
| Comp7  | 4,4'-Diapolycopene                                                              | B                  |
| Comp8  | 4_4'-diapophytoene                                                              | B                  |
| Comp9  | 4_4'-Diapophytoene-isomer2                                                      | B                  |
| Comp10 | 4_4'-Diapophytoene-isomer3                                                      | B                  |
| Comp11 | Phytofluene                                                                     | A                  |
| Comp12 | Phytofluene-isomer                                                              | B                  |
| Comp13 | Phytoene                                                                        | A                  |
| Comp14 | Phytoene-isomer                                                                 | B                  |
| Comp15 | Phytoene-isomer2                                                                | B                  |
| Comp16 | Phytoene-isomer3                                                                | B                  |
| Comp17 | Phytoene-isomer4                                                                | B                  |
| Comp18 | $\alpha$ -Carotene                                                              | A                  |
| Comp19 | All-trans axerophthene-isomer1                                                  | B                  |
| Comp20 | All-trans axerophthene-isomer2                                                  | B                  |
| Comp21 | All-Trans-3,4-Didehydrolycopene                                                 | B                  |
| Comp22 | All-Trans-3,4-Didehydrolycopene-isomer                                          | B                  |
| Comp23 | All-Trans-3,5-Didehydrolycopene-isomer2                                         | B                  |
| Comp24 | All-Trans-3,6-Didehydrolycopene-isomer3                                         | B                  |
| Comp25 | All-Trans-3,7-Didehydrolycopene-isomer4                                         | B                  |
| Comp26 | All-Trans-3,8-Didehydrolycopene-isomer5                                         | B                  |
| Comp27 | Alpha-Zeacarotene                                                               | B                  |
| Comp28 | Alpha-Zeacarotene-isomer                                                        | B                  |
| Comp29 | Alpha-Zeacarotene-isomer2                                                       | B                  |
| Comp30 | Alpha-Zeacarotene-isomer3                                                       | B                  |
| Comp31 | Alpha-Zeacarotene-isomer4                                                       | B                  |
| Comp32 | Antheraxanthin                                                                  | A                  |
| Comp33 | Antheraxanthin-isomer3                                                          | B                  |
| Comp34 | Apo-10'-zeaxanthin                                                              | B                  |
| Comp35 | APO-11-zeaxanthin                                                               | B                  |
| Comp36 | APO-12'-capsorubin-isomer                                                       | B                  |
| Comp37 | APO-9-zeaxanthinone-isomer                                                      | B                  |
| Comp38 | $\beta$ -Carotene                                                               | A                  |
| Comp39 | $\beta$ -Cryptoxanthin                                                          | A                  |
| Comp40 | $\beta$ -Ionene                                                                 | B                  |
| Comp41 | Bisdehydrolycopene/ Tetradehydrolycopene                                        | B                  |
| Comp42 | Bisdehydrolycopene/ Tetradehydrolycopene-isomer                                 | B                  |
| Comp43 | Citranaxanthin-isomer                                                           | B                  |
| Comp44 | $\delta$ -Carotene                                                              | A                  |

|        |                                                |   |
|--------|------------------------------------------------|---|
| Comp45 | Dihydrospheroidene/Methoxyneurosporene         | B |
| Comp46 | Dihydrospheroidene/Methoxyneurosporene-isomer  | B |
| Comp47 | Dihydrospheroidene/Methoxyneurosporene-isomer2 | B |
| Comp48 | Echinenone/(Myxoxanthin)-isomer1               | B |
| Comp49 | Echinenone/(Myxoxanthin)-isomer2               | B |
| Comp50 | $\gamma$ -Carotene                             | A |
| Comp51 | Ionene-isomer                                  | B |
| Comp52 | Lactucaxanthin-isomer1                         | B |
| Comp53 | Lactucaxanthin-isomer2                         | B |
| Comp54 | Lutein-H2O                                     | A |
| Comp55 | Lycopene                                       | A |
| Comp56 | Neoxanthin-isomer                              | B |
| Comp57 | Violaxanthin                                   | A |
| Comp58 | Violaxanthin-isomer                            | B |
| Comp59 | Zeaxanthin                                     | A |
| Comp60 | Zeaxanthin-isomer                              | B |
| Comp61 | Zeinoxanthin                                   | A |
| Comp62 | $\zeta$ -Carotene                              | B |
| Comp63 | $\zeta$ -Carotene-isomer                       | B |
| Comp64 | $\zeta$ -Carotene-isomer2                      | B |
| Comp65 | $\zeta$ -Carotene-isomer3                      | B |

<sup>a</sup>: Level of identification. (A) standard; (B) Public databases and MS/MS.

**Table S3. The proportion level of  $\beta$ -cryptoxanthin in citrus accessions.**

| Accession | Common name          | Category                | Proportion Level of $\beta$ -Cryptoxanthin | Ratio of $\beta$ -Cryptoxanthin to Violaxanthin |
|-----------|----------------------|-------------------------|--------------------------------------------|-------------------------------------------------|
| FS        | Buddha'S Hand        | Citron                  | Low                                        | 0.00                                            |
| JY        | Citron               | Citron                  | Low                                        | 0.00                                            |
| 14J       | Coctail Grapefruit   | Grapefruit              | Low                                        | 0.05                                            |
| Flame     | Flame grapefruit     | Grapefruit              | Low                                        | 0.00                                            |
| HY        | Huyou                | Grapefruit              | Low                                        | 0.08                                            |
| PAR       | Marsh grapefruit     | Grapefruit              | Low                                        | 0.00                                            |
| Ruby      | Star Ruby grapefruit | Grapefruit              | Low                                        | 0.00                                            |
| BJ        | Beijing lemon        | Lemon                   | Low                                        | 0.00                                            |
| CNM       | Rough lemmon         | Lemon                   | Low                                        | 0.00                                            |
| HYNM      | Huaye lemon          | Lemon                   | Low                                        | 0.00                                            |
| ML        | Muli                 | Lemon                   | Low                                        | 0.00                                            |
| TNM       | Tu lemmon            | Lemon                   | High                                       | 14.01                                           |
| XSNM      | Xiangshui lemmon     | Lemon                   | Low                                        | 0.00                                            |
| YLK       | Eureka Lemon         | Lemon                   | Low                                        | 0.00                                            |
| 18H       | Red Tangerine        | Cultivated mandarin MD1 | High                                       | 1.73                                            |
| 19P       | Ponkan               | Cultivated mandarin MD1 | High                                       | 3.39                                            |
| 20H       | Bendizao             | Cultivated mandarin MD1 | High                                       | 2.24                                            |
| AJHJ      | Anjianghongju        | Cultivated mandarin MD1 | High                                       | 1.33                                            |
| BJM       | Baiju                | Cultivated mandarin MD1 | High                                       | 3.49                                            |
| CH        | Chihong              | Cultivated mandarin MD1 | High                                       | 1.41                                            |
| CSNJ      | Changshananju        | Cultivated mandarin MD1 | High                                       | 1.60                                            |
| DFHP      | Dafeng Huangpiju     | Cultivated mandarin MD1 | High                                       | 3.30                                            |
| DHP       | Dahongpao            | Cultivated mandarin MD1 | High                                       | 2.13                                            |
| DWJ       | Diwangju             | Cultivated mandarin MD1 | High                                       | 2.84                                            |
| EDXG      | Edangxianggan        | Cultivated mandarin MD1 | High                                       | 4.07                                            |
| FDJ       | Fengdongju           | Cultivated mandarin MD1 | High                                       | 4.51                                            |
| FJ        | Fuju                 | Cultivated mandarin MD1 | High                                       | 1.72                                            |
| GJ        | Guangju              | Cultivated mandarin MD1 | High                                       | 8.81                                            |
| GJ1       | Guiju-1              | Cultivated mandarin MD1 | High                                       | 1.43                                            |

---

|       |                   |                         |      |      |
|-------|-------------------|-------------------------|------|------|
| GMZ   | Guangmingzao      | Cultivated mandarin MD1 | High | 9.65 |
| HG2   | Huagan-2          | Cultivated mandarin MD1 | High | 2.37 |
| HLM   | Huanglinmiao      | Cultivated mandarin MD1 | High | 2.71 |
| HYBDZ | Huangyan Bendizao | Cultivated mandarin MD1 | High | 1.78 |
| JGA   | Jiangan           | Cultivated mandarin MD1 | High | 1.38 |
| LH    | Liaohong          | Cultivated mandarin MD1 | High | 1.24 |
| MJ    | Manju             | Cultivated mandarin MD1 | High | 3.21 |
| MTH   | Mantouhong        | Cultivated mandarin MD1 | High | 1.87 |
| N8005 | Tiqie mandarin    | Cultivated mandarin MD1 | High | 4.76 |
| NFJ   | Nanfengmiju       | Cultivated mandarin MD1 | High | 3.00 |
| NRH   | Niurouhong        | Cultivated mandarin MD1 | High | 1.42 |
| OG    | Ougan             | Cultivated mandarin MD1 | Low  | 0.56 |
| QHJ   | Qinghongju        | Cultivated mandarin MD1 | High | 1.46 |
| QJPG  | Qingjiang Ponkan  | Cultivated mandarin MD1 | High | 3.87 |
| RH    | Sunki             | Cultivated mandarin MD1 | High | 1.72 |
| RJ    | Ruju              | Cultivated mandarin MD1 | High | 2.39 |
| RN1   | Rinan-1 Satsuma   | Cultivated mandarin MD1 | High | 7.11 |
| SH    | Suhong            | Cultivated mandarin MD1 | High | 1.08 |
| TJ    | Tu mandarin       | Cultivated mandarin MD1 | High | 4.85 |
| TT    | Taitian Ponkan    | Cultivated mandarin MD1 | High | 2.08 |
| WGD   | Wuganda mandairn  | Cultivated mandarin MD1 | High | 3.50 |
| WHPG  | Seedless Ponkan   | Cultivated mandarin MD1 | High | 2.59 |
| XNPG  | Xinnv Ponkan      | Cultivated mandarin MD1 | High | 5.88 |
| XYMJ  | Xinyumiju         | Cultivated mandarin MD1 | High | 3.64 |
| YJNJ  | Yuanjiangnanju    | Cultivated mandarin MD1 | High | 1.38 |
| ZHJ   | Zhuhongju         | Cultivated mandarin MD1 | High | 1.78 |
| BG    | Biangan           | Cultivated mandarin MD2 | Low  | 0.73 |
| BTJ   | Bingtangju        | Cultivated mandarin MD2 | High | 1.61 |
| BYJ   | Bayueju           | Cultivated mandarin MD2 | Low  | 0.32 |
| CTJ   | Chutianju         | Cultivated mandarin MD2 | Low  | 0.21 |
| CZG   | Chachigan         | Cultivated mandarin MD2 | High | 6.42 |

---

|       |                   |                         |      |      |
|-------|-------------------|-------------------------|------|------|
| HG    | Hanggan           | Cultivated mandarin MD2 | Low  | 0.36 |
| MGJ   | Manguju           | Cultivated mandarin MD2 | Low  | 0.48 |
| MLTJ  | Mingliutianju     | Cultivated mandarin MD2 | Low  | 0.24 |
| MSJ   | Mashuiju          | Cultivated mandarin MD2 | Low  | 0.27 |
| NJ    | Nianju            | Cultivated mandarin MD2 | Low  | 0.28 |
| STJ   | Shatangju         | Cultivated mandarin MD2 | Low  | 0.29 |
| YNJ   | Vietnamju         | Cultivated mandarin MD2 | Low  | 0.50 |
| YSJ   | Yangshan mandarin | Cultivated mandarin MD2 | Low  | 0.19 |
| ZSJ   | Zhushaju          | Cultivated mandarin MD2 | High | 2.10 |
| AJJ   | Aijiju            | Mandarin hybrid         | High | 5.34 |
| BZH   | Buzhihuo          | Mandarin hybrid         | High | 1.91 |
| CLM   | Clementin         | Mandarin hybrid         | High | 2.40 |
| FC    | Fairchild         | Mandarin hybrid         | High | 3.01 |
| GG    | Gonggan           | Mandarin hybrid         | Low  | 0.06 |
| JG    | Jiaogan           | Mandarin hybrid         | Low  | 0.43 |
| MLG   | Moluogesuanju     | Mandarin hybrid         | High | 2.65 |
| Ota   | Ortanique tangor  | Mandarin hybrid         | Low  | 0.27 |
| QH117 | Qihui             | Mandarin hybrid         | High | 2.11 |
| SM    | Satsuma Mandarin  | Mandarin hybrid         | High | 6.88 |
| WLK   | Wilking           | Mandarin hybrid         | Low  | 0.24 |
| WMCot | W-Mcot            | Mandarin hybrid         | High | 2.75 |
| YCLM  | MA-10             | Mandarin hybrid         | High | 4.51 |
| ZYJ   | Zhuanyouju        | Mandarin hybrid         | High | 1.41 |
| BPJ   | Bianpingju        | Mandarin unclassified   | High | 5.57 |
| CXSJ  | Cengxisuanju      | Mandarin unclassified   | High | 2.94 |
| GHSJ  | Guihusuanju       | Mandarin unclassified   | High | 1.82 |
| MBMJ  | Mabimiju          | Mandarin unclassified   | High | 6.23 |
| MSJ2  | Mashiju           | Mandarin unclassified   | High | 2.03 |
| SCM   | Sun Chu Sha Kat   | Mandarin unclassified   | High | 1.18 |
| SJ    | Suanju            | Mandarin unclassified   | High | 3.93 |
| STSJ  | Shantousuanju     | Mandarin unclassified   | High | 2.29 |

|       |                         |                            |      |      |
|-------|-------------------------|----------------------------|------|------|
| HPJ   | Daoxian huapi           | Semi domesticated mandarin | High | 4.20 |
| 8L    | Tachibana Mandarin      | Wild mandarin              | Low  | 0.03 |
| CYY   | Chongyi wild mandarin   | Wild mandarin              | High | 4.47 |
| DX4   | Daoxian wild mandarin   | Wild mandarin              | High | 3.62 |
| JYY   | Jiangyong wild mandarin | Wild mandarin              | High | 8.45 |
| MS1   | Mangshan wild mandarin  | Wild mandarin              | High | 4.32 |
| CHZG  | Chaozhogan              | Mandarin unclassified      | High | 0.84 |
| G SJ  | Gongsunju               | Mandarin unclassified      | Low  | 0.65 |
| 10Z   | Zipi Pummelo            | Pummelo                    | Low  | 0.00 |
| 28H   | Huazhoujuhong           | Pummelo                    | Low  | 0.00 |
| CHP   | Chandler                | Pummelo                    | Low  | 0.00 |
| DGH   | Daguohong Pummelo       | Pummelo                    | Low  | 0.00 |
| DJY   | Dianjiang red Pummelo   | Pummelo                    | Low  | 0.00 |
| FCY   | Feicui Pummelo          | Pummelo                    | Low  | 0.00 |
| FHY   | Fenghuang Pummelo       | Pummelo                    | Low  | 0.00 |
| GBY   | Kaopan Pummelo          | Pummelo                    | Low  | 0.00 |
| GXY   | Guanximi Pummelo        | Pummelo                    | Low  | 0.00 |
| GY-1  | Gui-1 Pummelo           | Pummelo                    | Low  | 0.00 |
| HB    | HB Pummelo              | Pummelo                    | Low  | 0.00 |
| HNHY  | Huanonghong Pummelo     | Pummelo                    | Low  | 0.00 |
| HSY   | Suan hongrou Pummelo    | Pummelo                    | Low  | 0.00 |
| JXY   | Jinxiang Pummelo        | Pummelo                    | Low  | 0.00 |
| LPY   | Liangping Pummelo       | Pummelo                    | Low  | 0.00 |
| PSY   | Pingshan Pummelo        | Pummelo                    | Low  | 0.00 |
| RGXY  | Red Guanxi Pummelo      | Pummelo                    | Low  | 0.00 |
| SJP   | Sijipao Pummelo         | Pummelo                    | Low  | 0.00 |
| SR3-2 | Majia Pummelo           | Pummelo                    | Low  | 0.00 |
| STY   | Shatian Pummelo         | Pummelo                    | Low  | 0.00 |
| SYBS  | Suanyou In Baishazhen   | Pummelo                    | Low  | 0.00 |
| WBY   | Wanbai Pummelo          | Pummelo                    | Low  | 0.00 |
| WSY   | Acidless Pummelo        | Pummelo                    | Low  | 0.00 |

---

|      |                        |                 |      |      |
|------|------------------------|-----------------|------|------|
| YGXY | Yellow Guanxi Pummelo  | Pummelo         | Low  | 0.00 |
| YHY  | Yuhuan Pummelo         | Pummelo         | Low  | 0.00 |
| YNMD | Yunnanmiandian         | Pummelo         | Low  | 0.00 |
| YNSJ | Yunnanshuijing Pummelo | Pummelo         | Low  | 0.00 |
| HP   | Huangpi Sour orange    | Unclassified    | Low  | 0.11 |
| HGG  | Huangguogan            | Mandarin hybrid | Low  | 0.42 |
| BH   | Bianhong lemon         | Sour orange     | Low  | 0.10 |
| DD   | Daidai                 | Sour orange     | High | 3.60 |
| DGTC | Dagoutoucheng          | Sour orange     | Low  | 0.74 |
| GC   | Gaocheng               | Sour orange     | Low  | 0.10 |
| GP   | Guangpi Sour orange    | Sour orange     | Low  | 0.19 |
| HTG  | Hutougan               | Sour orange     | Low  | 0.37 |
| HZL  | Zhuluanhongguo         | Sour orange     | Low  | 0.22 |
| LHE  | lianhe Sour orange     | Sour orange     | Low  | 0.76 |
| 13X  | Blood Orange           | Sweet orange    | Low  | 0.38 |
| 29B  | Bingtangcheng          | Sweet orange    | Low  | 0.09 |
| AJTC | Aijitangcheng          | Sweet orange    | Low  | 0.05 |
| AL   | Anliu Sweet orange     | Sweet orange    | Low  | 0.09 |
| BuDD | BuDD blood orange      | Sweet orange    | Low  | 0.17 |
| DH2  | Dahongtiancheng        | Sweet orange    | Low  | 0.09 |
| HAL  | Honganliu              | Sweet orange    | Low  | 0.17 |
| HML  | Hamlin Sweet orange    | Sweet orange    | Low  | 0.09 |
| HRQC | Caracara               | Sweet orange    | Low  | 0.16 |
| JC   | Jincheng               | Sweet orange    | Low  | 0.09 |
| LQ   | Robertson navel orange | Sweet orange    | Low  | 0.17 |
| NHE  | Newhall navel orange   | Sweet orange    | Low  | 0.17 |
| SO3  | Valencia Orange        | Sweet orange    | Low  | 0.52 |
| ZJ   | Zaojin Sweet orange    | Sweet orange    | Low  | 0.07 |

---



**Table S4. Annotation of proteins encoded by candidate genes.**

| <b>ID</b>  | <b>Annotation</b>                                                                |
|------------|----------------------------------------------------------------------------------|
| Cg6g012040 | Pfam: FAR1 DNA-binding domain; PANTHER: Protein FAR1-related sequence 10-related |
| Cg6g012050 | Pfam: FAR1 DNA-binding domain; PANTHER: Protein FAR1-related sequence 10-related |
| Cg6g012060 | Pfam: Cytochrome P450; PANTHER: Cytochrome P450 97B3                             |
| Cg6g012070 | Pfam: VQ motif; PANTHER: VQ motif-containing protein 2                           |
| Cg6g012080 | Pfam: Pectinesterase 1; PANTHER: Pectinesterase 8-related 1                      |

**Table S5. CYP97 family homologs from other plants.**

| <b>Name</b> | <b>Accession ID in NCBI</b> |
|-------------|-----------------------------|
| At-CYP97A3  | AAL08302                    |
| Dc-CYP97A3  | JQ655297                    |
| Os-CYP97A4  | EEC74248.1                  |
| Mt-CYP97A10 | ABD28565.1                  |
| Sl-CYP97A29 | ACJ25969                    |
| Rc-CYP97A   | XP_002512609.1              |
| OS-CYP97A4  | AK068163                    |
| Ps-CYP97B1  | CAA89260                    |
| Gm-CYP97B2  | AAB94586                    |
| At-CYP97B3  | CAB10290                    |
| OS-CYP97B4  | AK100596                    |
| At-CYP97C1  | AAM13903                    |
| Dc-CYP97C1  | ABB52076                    |
| Os-CYP97C2  | AAK20054                    |
| Mt-CYP97C10 | ABC59096                    |
| Sl-CYP97C11 | ACJ25968                    |
| Rc-CYP97C   | XP_002519427.1              |

**Table S6. Haplotypes and SV types of the *CitCYP97B* promoter in *Citrus* accessions used in this study.**

| Accession | Genotypes | Haplotypes  | SV type of alleles |   | SNP16 | SNP15 | SNP14 | SNP10 | SNP9 | SNP8 | SNP7 | SNP6 | SNP5 | SNP4 | SNP3 | SNP2 | SNP1 |
|-----------|-----------|-------------|--------------------|---|-------|-------|-------|-------|------|------|------|------|------|------|------|------|------|
| 18H       | Geno.1    | Hap.1/Hap.1 | /                  | / | G/G   | C/C   | C/C   | T/T   | C/C  | G/G  | T/T  | G/G  | G/G  | G/G  | A/A  | A/A  | T/T  |
| 19P       | Geno.1    | Hap.1/Hap.1 | /                  | / | G/G   | C/C   | C/C   | T/T   | C/C  | G/G  | T/T  | G/G  | G/G  | G/G  | A/A  | A/A  | T/T  |
| 20H       | Geno.1    | Hap.1/Hap.1 | /                  | / | G/G   | C/C   | C/C   | T/T   | C/C  | G/G  | T/T  | G/G  | G/G  | G/G  | A/A  | A/A  | T/T  |
| BJM       | Geno.1    | Hap.1/Hap.1 | /                  | / | G/G   | C/C   | C/C   | T/T   | C/C  | G/G  | T/T  | G/G  | G/G  | G/G  | A/A  | A/A  | T/T  |
| BZH       | Geno.1    | Hap.1/Hap.1 | /                  | / | G/G   | C/C   | C/C   | T/T   | C/C  | G/G  | T/T  | G/G  | G/G  | G/G  | A/A  | A/A  | T/T  |
| CHZG      | Geno.1    | Hap.1/Hap.1 | /                  | / | G/G   | C/C   | C/C   | T/T   | C/C  | G/G  | T/T  | G/G  | G/G  | G/G  | A/A  | A/A  | T/T  |
| CSNJ      | Geno.1    | Hap.1/Hap.1 | /                  | / | G/G   | C/C   | C/C   | T/T   | C/C  | G/G  | T/T  | G/G  | G/G  | G/G  | A/A  | A/A  | T/T  |
| CXSJ      | Geno.1    | Hap.1/Hap.1 | /                  | / | G/G   | C/C   | C/C   | T/T   | C/C  | G/G  | T/T  | G/G  | G/G  | G/G  | A/A  | A/A  | T/T  |
| DFHP      | Geno.1    | Hap.1/Hap.1 | /                  | / | G/G   | C/C   | C/C   | T/T   | C/C  | G/G  | T/T  | G/G  | G/G  | G/G  | A/A  | A/A  | T/T  |
| DHP       | Geno.1    | Hap.1/Hap.1 | /                  | / | G/G   | C/C   | C/C   | T/T   | C/C  | G/G  | T/T  | G/G  | G/G  | G/G  | A/A  | A/A  | T/T  |
| DWJ       | Geno.1    | Hap.1/Hap.1 | /                  | / | G/G   | C/C   | C/C   | T/T   | C/C  | G/G  | T/T  | G/G  | G/G  | G/G  | A/A  | A/A  | T/T  |
| EDXG      | Geno.1    | Hap.1/Hap.1 | /                  | / | G/G   | C/C   | C/C   | T/T   | C/C  | G/G  | T/T  | G/G  | G/G  | G/G  | A/A  | A/A  | T/T  |
| FC        | Geno.1    | Hap.1/Hap.1 | /                  | / | G/G   | C/C   | C/C   | T/T   | C/C  | G/G  | T/T  | G/G  | G/G  | G/G  | A/A  | A/A  | T/T  |
| FDJ       | Geno.1    | Hap.1/Hap.1 | /                  | / | G/G   | C/C   | C/C   | T/T   | C/C  | G/G  | T/T  | G/G  | G/G  | G/G  | A/A  | A/A  | T/T  |
| FJ        | Geno.1    | Hap.1/Hap.1 | /                  | / | G/G   | C/C   | C/C   | T/T   | C/C  | G/G  | T/T  | G/G  | G/G  | G/G  | A/A  | A/A  | T/T  |
| GHSJ      | Geno.1    | Hap.1/Hap.1 | /                  | / | G/G   | C/C   | C/C   | T/T   | C/C  | G/G  | T/T  | G/G  | G/G  | G/G  | A/A  | A/A  | T/T  |
| GJ        | Geno.1    | Hap.1/Hap.1 | /                  | / | G/G   | C/C   | C/C   | T/T   | C/C  | G/G  | T/T  | G/G  | G/G  | G/G  | A/A  | A/A  | T/T  |
| GJ1       | Geno.1    | Hap.1/Hap.1 | /                  | / | G/G   | C/C   | C/C   | T/T   | C/C  | G/G  | T/T  | G/G  | G/G  | G/G  | A/A  | A/A  | T/T  |
| GMZ       | Geno.1    | Hap.1/Hap.1 | /                  | / | G/G   | C/C   | C/C   | T/T   | C/C  | G/G  | T/T  | G/G  | G/G  | G/G  | A/A  | A/A  | T/T  |
| HG2       | Geno.1    | Hap.1/Hap.1 | /                  | / | G/G   | C/C   | C/C   | T/T   | C/C  | G/G  | T/T  | G/G  | G/G  | G/G  | A/A  | A/A  | T/T  |
| HLM       | Geno.1    | Hap.1/Hap.1 | /                  | / | G/G   | C/C   | C/C   | T/T   | C/C  | G/G  | T/T  | G/G  | G/G  | G/G  | A/A  | A/A  | T/T  |
| HPJ       | Geno.1    | Hap.1/Hap.1 | /                  | / | G/G   | C/C   | C/C   | T/T   | C/C  | G/G  | T/T  | G/G  | G/G  | G/G  | A/A  | A/A  | T/T  |
| HYBDZ     | Geno.1    | Hap.1/Hap.1 | /                  | / | G/G   | C/C   | C/C   | T/T   | C/C  | G/G  | T/T  | G/G  | G/G  | G/G  | A/A  | A/A  | T/T  |
| JGA       | Geno.1    | Hap.1/Hap.1 | /                  | / | G/G   | C/C   | C/C   | T/T   | C/C  | G/G  | T/T  | G/G  | G/G  | G/G  | A/A  | A/A  | T/T  |
| MBMJ      | Geno.1    | Hap.1/Hap.1 | /                  | / | G/G   | C/C   | C/C   | T/T   | C/C  | G/G  | T/T  | G/G  | G/G  | G/G  | A/A  | A/A  | T/T  |
| MJ        | Geno.1    | Hap.1/Hap.1 | /                  | / | G/G   | C/C   | C/C   | T/T   | C/C  | G/G  | T/T  | G/G  | G/G  | G/G  | A/A  | A/A  | T/T  |
| MLG       | Geno.1    | Hap.1/Hap.1 | /                  | / | G/G   | C/C   | C/C   | T/T   | C/C  | G/G  | T/T  | G/G  | G/G  | G/G  | A/A  | A/A  | T/T  |
| MS1       | Geno.1    | Hap.1/Hap.1 | /                  | / | G/G   | C/C   | C/C   | T/T   | C/C  | G/G  | T/T  | G/G  | G/G  | G/G  | A/A  | A/A  | T/T  |
| MSJ2      | Geno.1    | Hap.1/Hap.1 | /                  | / | G/G   | C/C   | C/C   | T/T   | C/C  | G/G  | T/T  | G/G  | G/G  | G/G  | A/A  | A/A  | T/T  |

|       |        |             |   |   |     |     |     |     |     |     |     |     |     |     |     |     |     |
|-------|--------|-------------|---|---|-----|-----|-----|-----|-----|-----|-----|-----|-----|-----|-----|-----|-----|
| MTH   | Geno.1 | Hap.1/Hap.1 | / | / | G/G | C/C | C/C | T/T | C/C | G/G | T/T | G/G | G/G | G/G | A/A | A/A | T/T |
| N8005 | Geno.1 | Hap.1/Hap.1 | / | / | G/G | C/C | C/C | T/T | C/C | G/G | T/T | G/G | G/G | G/G | A/A | A/A | T/T |
| NFJ   | Geno.1 | Hap.1/Hap.1 | / | / | G/G | C/C | C/C | T/T | C/C | G/G | T/T | G/G | G/G | G/G | A/A | A/A | T/T |
| QH117 | Geno.1 | Hap.1/Hap.1 | / | / | G/G | C/C | C/C | T/T | C/C | G/G | T/T | G/G | G/G | G/G | A/A | A/A | T/T |
| QHJ   | Geno.1 | Hap.1/Hap.1 | / | / | G/G | C/C | C/C | T/T | C/C | G/G | T/T | G/G | G/G | G/G | A/A | A/A | T/T |
| QJPG  | Geno.1 | Hap.1/Hap.1 | / | / | G/G | C/C | C/C | T/T | C/C | G/G | T/T | G/G | G/G | G/G | A/A | A/A | T/T |
| RH    | Geno.1 | Hap.1/Hap.1 | / | / | G/G | C/C | C/C | T/T | C/C | G/G | T/T | G/G | G/G | G/G | A/A | A/A | T/T |
| RJ    | Geno.1 | Hap.1/Hap.1 | / | / | G/G | C/C | C/C | T/T | C/C | G/G | T/T | G/G | G/G | G/G | A/A | A/A | T/T |
| RN1   | Geno.1 | Hap.1/Hap.1 | / | / | G/G | C/C | C/C | T/T | C/C | G/G | T/T | G/G | G/G | G/G | A/A | A/A | T/T |
| SCM   | Geno.1 | Hap.1/Hap.1 | / | / | G/G | C/C | C/C | T/T | C/C | G/G | T/T | G/G | G/G | G/G | A/A | A/A | T/T |
| SH    | Geno.1 | Hap.1/Hap.1 | / | / | G/G | C/C | C/C | T/T | C/C | G/G | T/T | G/G | G/G | G/G | A/A | A/A | T/T |
| SJ    | Geno.1 | Hap.1/Hap.1 | / | / | G/G | C/C | C/C | T/T | C/C | G/G | T/T | G/G | G/G | G/G | A/A | A/A | T/T |
| SM    | Geno.1 | Hap.1/Hap.1 | / | / | G/G | C/C | C/C | T/T | C/C | G/G | T/T | G/G | G/G | G/G | A/A | A/A | T/T |
| STSJ  | Geno.1 | Hap.1/Hap.1 | / | / | G/G | C/C | C/C | T/T | C/C | G/G | T/T | G/G | G/G | G/G | A/A | A/A | T/T |
| TJ    | Geno.1 | Hap.1/Hap.1 | / | / | G/G | C/C | C/C | T/T | C/C | G/G | T/T | G/G | G/G | G/G | A/A | A/A | T/T |
| TT    | Geno.1 | Hap.1/Hap.1 | / | / | G/G | C/C | C/C | T/T | C/C | G/G | T/T | G/G | G/G | G/G | A/A | A/A | T/T |
| WGD   | Geno.1 | Hap.1/Hap.1 | / | / | G/G | C/C | C/C | T/T | C/C | G/G | T/T | G/G | G/G | G/G | A/A | A/A | T/T |
| WHPG  | Geno.1 | Hap.1/Hap.1 | / | / | G/G | C/C | C/C | T/T | C/C | G/G | T/T | G/G | G/G | G/G | A/A | A/A | T/T |
| WMCot | Geno.1 | Hap.1/Hap.1 | / | / | G/G | C/C | C/C | T/T | C/C | G/G | T/T | G/G | G/G | G/G | A/A | A/A | T/T |
| XNPG  | Geno.1 | Hap.1/Hap.1 | / | / | G/G | C/C | C/C | T/T | C/C | G/G | T/T | G/G | G/G | G/G | A/A | A/A | T/T |
| XYMJ  | Geno.1 | Hap.1/Hap.1 | / | / | G/G | C/C | C/C | T/T | C/C | G/G | T/T | G/G | G/G | G/G | A/A | A/A | T/T |
| YJNJ  | Geno.1 | Hap.1/Hap.1 | / | / | G/G | C/C | C/C | T/T | C/C | G/G | T/T | G/G | G/G | G/G | A/A | A/A | T/T |
| ZYJ   | Geno.1 | Hap.1/Hap.1 | / | / | G/G | C/C | C/C | T/T | C/C | G/G | T/T | G/G | G/G | G/G | A/A | A/A | T/T |
| 10Z   | Geno.2 | Hap.3/Hap.3 | / | / | A/A | T/T | T/T | G/G | G/G | A/A | C/C | A/A | A/A | A/A | G/G | G/G | C/C |
| 28H   | Geno.2 | Hap.3/Hap.3 | / | / | A/A | T/T | T/T | G/G | G/G | A/A | C/C | A/A | A/A | A/A | G/G | G/G | C/C |
| CHP   | Geno.2 | Hap.3/Hap.3 | / | / | A/A | T/T | T/T | G/G | G/G | A/A | C/C | A/A | A/A | A/A | G/G | G/G | C/C |
| DGH   | Geno.2 | Hap.3/Hap.3 | / | / | A/A | T/T | T/T | G/G | G/G | A/A | C/C | A/A | A/A | A/A | G/G | G/G | C/C |
| DJY   | Geno.2 | Hap.3/Hap.3 | / | / | A/A | T/T | T/T | G/G | G/G | A/A | C/C | A/A | A/A | A/A | G/G | G/G | C/C |
| FCY   | Geno.2 | Hap.3/Hap.3 | / | / | A/A | T/T | T/T | G/G | G/G | A/A | C/C | A/A | A/A | A/A | G/G | G/G | C/C |
| FHY   | Geno.2 | Hap.3/Hap.3 | / | / | A/A | T/T | T/T | G/G | G/G | A/A | C/C | A/A | A/A | A/A | G/G | G/G | C/C |
| GBY   | Geno.2 | Hap.3/Hap.3 | / | / | A/A | T/T | T/T | G/G | G/G | A/A | C/C | A/A | A/A | A/A | G/G | G/G | C/C |

|       |        |             |                  |                  |     |     |     |     |     |     |     |     |     |     |     |     |     |
|-------|--------|-------------|------------------|------------------|-----|-----|-----|-----|-----|-----|-----|-----|-----|-----|-----|-----|-----|
| GXY   | Geno.2 | Hap.3/Hap.3 | /                | /                | A/A | T/T | T/T | G/G | G/G | A/A | C/C | A/A | A/A | A/A | G/G | G/G | C/C |
| GY-1  | Geno.2 | Hap.3/Hap.3 | /                | /                | A/A | T/T | T/T | G/G | G/G | A/A | C/C | A/A | A/A | A/A | G/G | G/G | C/C |
| HB    | Geno.2 | Hap.3/Hap.3 | /                | /                | A/A | T/T | T/T | G/G | G/G | A/A | C/C | A/A | A/A | A/A | G/G | G/G | C/C |
| HNHY  | Geno.2 | Hap.3/Hap.3 | /                | /                | A/A | T/T | T/T | G/G | G/G | A/A | C/C | A/A | A/A | A/A | G/G | G/G | C/C |
| HSY   | Geno.2 | Hap.3/Hap.3 | /                | /                | A/A | T/T | T/T | G/G | G/G | A/A | C/C | A/A | A/A | A/A | G/G | G/G | C/C |
| HY    | Geno.2 | Hap.3/Hap.3 | /                | /                | A/A | T/T | T/T | G/G | G/G | A/A | C/C | A/A | A/A | A/A | G/G | G/G | C/C |
| JXY   | Geno.2 | Hap.3/Hap.3 | /                | /                | A/A | T/T | T/T | G/G | G/G | A/A | C/C | A/A | A/A | A/A | G/G | G/G | C/C |
| LPY   | Geno.2 | Hap.3/Hap.3 | /                | /                | A/A | T/T | T/T | G/G | G/G | A/A | C/C | A/A | A/A | A/A | G/G | G/G | C/C |
| PSY   | Geno.2 | Hap.3/Hap.3 | /                | /                | A/A | T/T | T/T | G/G | G/G | A/A | C/C | A/A | A/A | A/A | G/G | G/G | C/C |
| RGXY  | Geno.2 | Hap.3/Hap.3 | /                | /                | A/A | T/T | T/T | G/G | G/G | A/A | C/C | A/A | A/A | A/A | G/G | G/G | C/C |
| SJP   | Geno.2 | Hap.3/Hap.3 | /                | /                | A/A | T/T | T/T | G/G | G/G | A/A | C/C | A/A | A/A | A/A | G/G | G/G | C/C |
| SR3-2 | Geno.2 | Hap.3/Hap.3 | /                | /                | A/A | T/T | T/T | G/G | G/G | A/A | C/C | A/A | A/A | A/A | G/G | G/G | C/C |
| STY   | Geno.2 | Hap.3/Hap.3 | /                | /                | A/A | T/T | T/T | G/G | G/G | A/A | C/C | A/A | A/A | A/A | G/G | G/G | C/C |
| SYBS  | Geno.2 | Hap.3/Hap.3 | /                | /                | A/A | T/T | T/T | G/G | G/G | A/A | C/C | A/A | A/A | A/A | G/G | G/G | C/C |
| WBY   | Geno.2 | Hap.3/Hap.3 | /                | /                | A/A | T/T | T/T | G/G | G/G | A/A | C/C | A/A | A/A | A/A | G/G | G/G | C/C |
| WSY   | Geno.2 | Hap.3/Hap.3 | /                | /                | A/A | T/T | T/T | G/G | G/G | A/A | C/C | A/A | A/A | A/A | G/G | G/G | C/C |
| YGXY  | Geno.2 | Hap.3/Hap.3 | /                | /                | A/A | T/T | T/T | G/G | G/G | A/A | C/C | A/A | A/A | A/A | G/G | G/G | C/C |
| YHY   | Geno.2 | Hap.3/Hap.3 | /                | /                | A/A | T/T | T/T | G/G | G/G | A/A | C/C | A/A | A/A | A/A | G/G | G/G | C/C |
| YNMD  | Geno.2 | Hap.3/Hap.3 | /                | /                | A/A | T/T | T/T | G/G | G/G | A/A | C/C | A/A | A/A | A/A | G/G | G/G | C/C |
| YNSJ  | Geno.2 | Hap.3/Hap.3 | /                | /                | A/A | T/T | T/T | G/G | G/G | A/A | C/C | A/A | A/A | A/A | G/G | G/G | C/C |
| FS    | Geno.3 | Hap.6/Hap.6 | 515 bp Insertion | 515 bp Insertion | A/A | T/T | C/C | T/T | G/G | A/A | C/C | A/A | A/A | A/A | G/G | G/G | C/C |
| JY    | Geno.3 | Hap.6/Hap.6 | 515 bp Insertion | 515 bp Insertion | A/A | T/T | C/C | T/T | G/G | A/A | C/C | A/A | A/A | A/A | G/G | G/G | C/C |
| XSNM  | Geno.3 | Hap.6/Hap.6 | 515 bp Insertion | 515 bp Insertion | A/A | T/T | C/C | T/T | G/G | A/A | C/C | A/A | A/A | A/A | G/G | G/G | C/C |
| BG    | Geno.4 | Hap.1/Hap.4 | /                | 133 bp Insertion | G/A | C/T | C/T | T/G | C/G | G/A | T/C | G/A | G/A | G/A | A/G | A/G | T/C |
| BYJ   | Geno.4 | Hap.1/Hap.4 | /                | 133 bp Insertion | G/A | C/T | C/T | T/G | C/G | G/A | T/C | G/A | G/A | G/A | A/G | A/G | T/C |
| CTJ   | Geno.4 | Hap.1/Hap.4 | /                | 133 bp Insertion | G/A | C/T | C/T | T/G | C/G | G/A | T/C | G/A | G/A | G/A | A/G | A/G | T/C |
| HG    | Geno.4 | Hap.1/Hap.4 | /                | 133 bp Insertion | G/A | C/T | C/T | T/G | C/G | G/A | T/C | G/A | G/A | G/A | A/G | A/G | T/C |
| JG    | Geno.4 | Hap.1/Hap.4 | /                | 133 bp Insertion | G/A | C/T | C/T | T/G | C/G | G/A | T/C | G/A | G/A | G/A | A/G | A/G | T/C |
| MGJ   | Geno.4 | Hap.1/Hap.4 | /                | 133 bp Insertion | G/A | C/T | C/T | T/G | C/G | G/A | T/C | G/A | G/A | G/A | A/G | A/G | T/C |
| MLTJ  | Geno.4 | Hap.1/Hap.4 | /                | 133 bp Insertion | G/A | C/T | C/T | T/G | C/G | G/A | T/C | G/A | G/A | G/A | A/G | A/G | T/C |
| MSJ   | Geno.4 | Hap.1/Hap.4 | /                | 133 bp Insertion | G/A | C/T | C/T | T/G | C/G | G/A | T/C | G/A | G/A | G/A | A/G | A/G | T/C |

|       |        |             |   |                  |     |     |     |     |     |     |     |     |     |     |     |     |     |
|-------|--------|-------------|---|------------------|-----|-----|-----|-----|-----|-----|-----|-----|-----|-----|-----|-----|-----|
| NJ    | Geno.4 | Hap.1/Hap.4 | / | 133 bp Insertion | G/A | C/T | C/T | T/G | C/G | G/A | T/C | G/A | G/A | G/A | A/G | A/G | T/C |
| STJ   | Geno.4 | Hap.1/Hap.4 | / | 133 bp Insertion | G/A | C/T | C/T | T/G | C/G | G/A | T/C | G/A | G/A | G/A | A/G | A/G | T/C |
| YNJ   | Geno.4 | Hap.1/Hap.4 | / | 133 bp Insertion | G/A | C/T | C/T | T/G | C/G | G/A | T/C | G/A | G/A | G/A | A/G | A/G | T/C |
| YSJ   | Geno.4 | Hap.1/Hap.4 | / | 133 bp Insertion | G/A | C/T | C/T | T/G | C/G | G/A | T/C | G/A | G/A | G/A | A/G | A/G | T/C |
| ZSJ   | Geno.4 | Hap.1/Hap.4 | / | 133 bp Insertion | G/A | C/T | C/T | T/G | C/G | G/A | T/C | G/A | G/A | G/A | A/G | A/G | T/C |
| 13X   | Geno.5 | Hap.1/Hap.5 | / | 335 bp Insertion | G/A | C/T | C/T | T/G | C/G | G/A | T/C | G/A | G/A | G/A | A/G | A/G | T/C |
| 29B   | Geno.5 | Hap.1/Hap.5 | / | 335 bp Insertion | G/A | C/T | C/T | T/G | C/G | G/A | T/C | G/A | G/A | G/A | A/G | A/G | T/C |
| AJTC  | Geno.5 | Hap.1/Hap.5 | / | 335 bp Insertion | G/A | C/T | C/T | T/G | C/G | G/A | T/C | G/A | G/A | G/A | A/G | A/G | T/C |
| AL    | Geno.5 | Hap.1/Hap.5 | / | 335 bp Insertion | G/A | C/T | C/T | T/G | C/G | G/A | T/C | G/A | G/A | G/A | A/G | A/G | T/C |
| BuDD  | Geno.5 | Hap.1/Hap.5 | / | 335 bp Insertion | G/A | C/T | C/T | T/G | C/G | G/A | T/C | G/A | G/A | G/A | A/G | A/G | T/C |
| DH2   | Geno.5 | Hap.1/Hap.5 | / | 335 bp Insertion | G/A | C/T | C/T | T/G | C/G | G/A | T/C | G/A | G/A | G/A | A/G | A/G | T/C |
| Flame | Geno.5 | Hap.1/Hap.5 | / | 335 bp Insertion | G/A | C/T | C/T | T/G | C/G | G/A | T/C | G/A | G/A | G/A | A/G | A/G | T/C |
| HAL   | Geno.5 | Hap.1/Hap.5 | / | 335 bp Insertion | G/A | C/T | C/T | T/G | C/G | G/A | T/C | G/A | G/A | G/A | A/G | A/G | T/C |
| HML   | Geno.5 | Hap.1/Hap.5 | / | 335 bp Insertion | G/A | C/T | C/T | T/G | C/G | G/A | T/C | G/A | G/A | G/A | A/G | A/G | T/C |
| HRQC  | Geno.5 | Hap.1/Hap.5 | / | 335 bp Insertion | G/A | C/T | C/T | T/G | C/G | G/A | T/C | G/A | G/A | G/A | A/G | A/G | T/C |
| JC    | Geno.5 | Hap.1/Hap.5 | / | 335 bp Insertion | G/A | C/T | C/T | T/G | C/G | G/A | T/C | G/A | G/A | G/A | A/G | A/G | T/C |
| LQ    | Geno.5 | Hap.1/Hap.5 | / | 335 bp Insertion | G/A | C/T | C/T | T/G | C/G | G/A | T/C | G/A | G/A | G/A | A/G | A/G | T/C |
| NHE   | Geno.5 | Hap.1/Hap.5 | / | 335 bp Insertion | G/A | C/T | C/T | T/G | C/G | G/A | T/C | G/A | G/A | G/A | A/G | A/G | T/C |
| HTG   | Geno.5 | Hap.1/Hap.5 | / | 335 bp Insertion | G/A | C/T | C/T | T/G | C/G | G/A | T/C | G/A | G/A | G/A | A/G | A/G | T/C |
| Ota   | Geno.5 | Hap.1/Hap.5 | / | 335 bp Insertion | G/A | C/T | C/T | T/G | C/G | G/A | T/C | G/A | G/A | G/A | A/G | A/G | T/C |
| Ruby  | Geno.5 | Hap.1/Hap.5 | / | 335 bp Insertion | G/A | C/T | C/T | T/G | C/G | G/A | T/C | G/A | G/A | G/A | A/G | A/G | T/C |
| SO3   | Geno.5 | Hap.1/Hap.5 | / | 335 bp Insertion | G/A | C/T | C/T | T/G | C/G | G/A | T/C | G/A | G/A | G/A | A/G | A/G | T/C |
| ZJ    | Geno.5 | Hap.1/Hap.5 | / | 335 bp Insertion | G/A | C/T | C/T | T/G | C/G | G/A | T/C | G/A | G/A | G/A | A/G | A/G | T/C |
| 14J   | Geno.6 | Hap.1/Hap.3 | / | /                | G/A | C/T | C/T | T/G | C/G | G/A | T/C | G/A | G/A | G/A | A/G | A/G | T/C |
| BH    | Geno.6 | Hap.1/Hap.3 | / | /                | G/A | C/T | C/T | T/G | C/G | G/A | T/C | G/A | G/A | G/A | A/G | A/G | T/C |
| BTJ   | Geno.6 | Hap.1/Hap.3 | / | /                | G/A | C/T | C/T | T/G | C/G | G/A | T/C | G/A | G/A | G/A | A/G | A/G | T/C |
| DD    | Geno.6 | Hap.1/Hap.3 | / | /                | G/A | C/T | C/T | T/G | C/G | G/A | T/C | G/A | G/A | G/A | A/G | A/G | T/C |
| DGTC  | Geno.6 | Hap.1/Hap.3 | / | /                | G/A | C/T | C/T | T/G | C/G | G/A | T/C | G/A | G/A | G/A | A/G | A/G | T/C |
| GC    | Geno.6 | Hap.1/Hap.3 | / | /                | G/A | C/T | C/T | T/G | C/G | G/A | T/C | G/A | G/A | G/A | A/G | A/G | T/C |
| HGG   | Geno.6 | Hap.1/Hap.3 | / | /                | G/A | C/T | C/T | T/G | C/G | G/A | T/C | G/A | G/A | G/A | A/G | A/G | T/C |
| HZL   | Geno.6 | Hap.1/Hap.3 | / | /                | G/A | C/T | C/T | T/G | C/G | G/A | T/C | G/A | G/A | G/A | A/G | A/G | T/C |

|      |         |              |                  |                  |     |     |     |     |     |     |     |     |     |     |     |     |     |
|------|---------|--------------|------------------|------------------|-----|-----|-----|-----|-----|-----|-----|-----|-----|-----|-----|-----|-----|
| LHE  | Geno.6  | Hap.1/Hap.3  | /                | /                | G/A | C/T | C/T | T/G | C/G | G/A | T/C | G/A | G/A | G/A | A/G | A/G | T/C |
| OG   | Geno.6  | Hap.1/Hap.3  | /                | /                | G/A | C/T | C/T | T/G | C/G | G/A | T/C | G/A | G/A | G/A | A/G | A/G | T/C |
| PAR  | Geno.6  | Hap.1/Hap.3  | /                | /                | G/A | C/T | C/T | T/G | C/G | G/A | T/C | G/A | G/A | G/A | A/G | A/G | T/C |
| WLK  | Geno.6  | Hap.1/Hap.3  | /                | /                | G/A | C/T | C/T | T/G | C/G | G/A | T/C | G/A | G/A | G/A | A/G | A/G | T/C |
| CNM  | Geno.7  | Hap.1/Hap.6  | /                | 515 bp Insertion | G/A | C/T | C/C | T/T | C/G | G/A | T/C | G/A | G/A | G/A | A/G | A/G | T/C |
| HYNM | Geno.7  | Hap.1/Hap.6  | /                | 515 bp Insertion | G/A | C/T | C/C | T/T | C/G | G/A | T/C | G/A | G/A | G/A | A/G | A/G | T/C |
| TNM  | Geno.7  | Hap.1/Hap.6  | /                | 515 bp Insertion | G/A | C/T | C/C | T/T | C/G | G/A | T/C | G/A | G/A | G/A | A/G | A/G | T/C |
| AJHJ | Geno.8  | Hap.1/Hap.2  | /                | /                | G/A | C/C | C/C | T/T | C/C | G/G | T/T | G/G | G/G | G/G | A/A | A/A | T/T |
| CH   | Geno.8  | Hap.1/Hap.2  | /                | /                | G/A | C/C | C/C | T/T | C/C | G/G | T/T | G/G | G/G | G/G | A/A | A/A | T/T |
| CYY  | Geno.8  | Hap.1/Hap.2  | /                | /                | G/A | C/C | C/C | T/T | C/C | G/G | T/T | G/G | G/G | G/G | A/A | A/A | T/T |
| DX4  | Geno.8  | Hap.1/Hap.2  | /                | /                | G/A | C/C | C/C | T/T | C/C | G/G | T/T | G/G | G/G | G/G | A/A | A/A | T/T |
| JYY  | Geno.8  | Hap.1/Hap.2  | /                | /                | G/A | C/C | C/C | T/T | C/C | G/G | T/T | G/G | G/G | G/G | A/A | A/A | T/T |
| LH   | Geno.8  | Hap.1/Hap.2  | /                | /                | G/A | C/C | C/C | T/T | C/C | G/G | T/T | G/G | G/G | G/G | A/A | A/A | T/T |
| NRH  | Geno.8  | Hap.1/Hap.2  | /                | /                | G/A | C/C | C/C | T/T | C/C | G/G | T/T | G/G | G/G | G/G | A/A | A/A | T/T |
| ZHJ  | Geno.8  | Hap.1/Hap.2  | /                | /                | G/A | C/C | C/C | T/T | C/C | G/G | T/T | G/G | G/G | G/G | A/A | A/A | T/T |
| AJJ  | Geno.9  | Hap.1/Hap.7  | /                | /                | G/G | C/C | C/C | T/T | C/C | G/G | T/T | G/G | G/A | G/A | A/G | A/G | T/C |
| CLM  | Geno.9  | Hap.1/Hap.7  | /                | /                | G/G | C/C | C/C | T/T | C/C | G/G | T/T | G/G | G/A | G/A | A/G | A/G | T/C |
| CZG  | Geno.9  | Hap.1/Hap.7  | /                | /                | G/G | C/C | C/C | T/T | C/C | G/G | T/T | G/G | G/A | G/A | A/G | A/G | T/C |
| YCLM | Geno.9  | Hap.1/Hap.7  | /                | /                | G/G | C/C | C/C | T/T | C/C | G/G | T/T | G/G | G/A | G/A | A/G | A/G | T/C |
| GG   | Geno.10 | Hap.4/Hap.5  | 133 bp Insertion | 335 bp Insertion | A/A | T/T | T/T | G/G | G/G | A/A | C/C | A/A | A/A | A/A | G/G | G/G | C/C |
| BPJ  | Geno.11 | Hap.2/Hap.2  | /                | /                | A/A | C/C | C/C | T/T | C/C | G/G | T/T | G/G | G/G | G/G | A/A | A/A | T/T |
| 8L   | Geno.12 | Hap.2/Hap.8  | /                | /                | A/A | C/T | C/C | T/T | C/C | G/A | T/T | G/G | G/A | G/A | A/G | A/A | T/T |
| BJ   | Geno.13 | Hap.2/Hap.6  | /                | 515 bp Insertion | A/A | C/T | C/C | T/T | C/G | G/A | T/C | G/A | G/A | G/A | A/G | A/G | T/C |
| ML   | Geno.14 | Hap.6/Hap.9  | 515 bp Insertion | 515 bp Insertion | G/A | C/T | C/C | T/T | C/G | G/A | T/C | G/A | G/A | G/A | A/G | A/G | T/C |
| YLK  | Geno.15 | Hap.1/Hap.10 | /                | /                | G/A | C/T | C/C | T/T | C/G | G/A | T/C | G/A | G/A | G/A | A/G | A/G | T/C |
| GP   | Geno.16 | Hap.1/Hap.11 | /                | /                | G/A | C/C | C/C | T/G | C/G | G/A | T/C | G/A | G/A | G/A | A/G | A/G | T/C |
| GSJ  | Geno.17 | Hap.1/Hap.12 | /                | /                | G/A | C/T | C/T | T/T | C/C | G/A | T/C | G/A | G/A | G/A | A/G | A/G | T/C |
| HP   | Geno.17 | Hap.1/Hap.12 | /                | /                | G/A | C/T | C/T | T/T | C/C | G/A | T/C | G/A | G/A | G/A | A/G | A/G | T/C |

**Table S7. Primers used in this study.**

| Notes                                                   | Name                         | Primer sequences (5'-3')                                |
|---------------------------------------------------------|------------------------------|---------------------------------------------------------|
| Gene cloning                                            | CitCYP97B-F                  | GTGGCTCGCTGGCCTTATT                                     |
|                                                         | CitCYP97B-R                  | TACAGTCAGTGGACAGCCGA                                    |
|                                                         | CitCYP97B-pro-F              | AGTCATCATTATGGCGATGGGGTAAC                              |
|                                                         | CitCYP97B-pro-R              | TGCAAGCCAAAATGCAATAAGGCC                                |
|                                                         | CitBCH1-F                    | TGTGGTCTGCGTCCATTTAA                                    |
|                                                         | CitBCH1-R                    | TTTACGCTCACGCCATTA                                      |
|                                                         | CitBCH2-F                    | ATGGCAAGTGGAATGTCATC                                    |
|                                                         | CitBCH2-R                    | CAGTTGAGCCTTAATTTAGC                                    |
| Marker for SV validation                                | CitCYP97B-pro-insert-F       | CCCGGTGCTGTTGATTTTATACA                                 |
|                                                         | CitCYP97B-pro-insert-R       | CACTTCCATGTTCTGTATTTTGA                                 |
| LUC vector construction                                 | pGreen0800-CitCYP97B-pro-F   | GGTCGACGGTATCGATAAGCTTAGTCATCATTATGGCGAT                |
|                                                         | pGreen0800-CitCYP97B-pro-R   | TTTATGTTTTTGGCGTCTTCCATGGTGCAAGCCAAAATGCAATAAGGCC       |
| Subcellular localization vector construction            | pRI121-CitCYP97B-F           | TGTTGATACATATGCCCGTCGACATGGCTACTACAACAACCTGTATCTTTCATCA |
|                                                         | pRI121-CitCYP97B-R           | TGCTCACCATGAATTCGGATCCGTGGACAGCCGATCTCTCCC              |
| Prokaryotic expression vector construction              | pRSFDuet-CitBCH1-F           | CGGCGCGCCTGCAGGTCGACATGGCGGTCGGACTA                     |
|                                                         | pRSFDuet-CitBCH1-R           | CATTATGCGGCCGCAAGCTTTTTTGGAAACCCTGTTGTATGATTTG          |
|                                                         | pRSFDuet-CitBCH2-F           | CGGCGCGCCTGCAGGTCGACATGGCAAGTGGAATGTCATCAGC             |
|                                                         | pRSFDuet-CitBCH2-R           | GCGGCCGCAAGCTTGTCGACCGTTTCTTTATCTAATCCTTCCGTGCCT        |
|                                                         | pRSFDuet-CitCYP97B-F         | GCGATCGCTGACGTCGGTACCATGTCTCCGTCTGTCAGA                 |
|                                                         | pRSFDuet-CitCYP97B-R         | GCGGTTTCTTTACCAGACTCGAGGTGGACAGCCGATCTCTCCC             |
| RNA interference and overexpression vector construction | Adapter-attB1-F              | GGGGACAAGTTTGTACAAAAAAGCAGGCT                           |
|                                                         | Adapter-attB2-R              | GGGGACCACTTTGTACAAGAAAGCTGGGT                           |
|                                                         | attB1-pHellgate8-CitCYP97B-F | AAAAAGCAGGCTTATCTCTTCAGCAGTTGGTTATGGC                   |
|                                                         | attB2-pHellgate8-CitCYP97B-R | AGAAAGCTGGGTTTGAACCAAGACTTCCGCCAC                       |

---

Primers used for qRT-PCR

|                  |                                          |
|------------------|------------------------------------------|
| MTGB-CitCYP97B-F | AGTCCGGAGCTAGCTCTAGAATGGCTACTACAACAAC    |
| MTGB-CitCYP97B-R | CCCTTGCTCACCATGGATCCGTGGACAGCCGATCTCTCCC |
| Actin-qPCR-F     | CCAAGCAGCATGAAGATCAA                     |
| Actin-qPCR-R     | ATCTGCTGGAAGGTGCTGAG                     |
| CitCYP97B-qPCR-F | ACCATACTTCTGGGACCGGC                     |
| CitCYP97B-qPCR-R | TGTTGCTCCAGTAACAAGTTCCAC                 |
| CrtB-qPCR-F      | TGGATTCCCAGTGAAGAAGGTC                   |
| CrtB-qPCR-R      | CATAATCTGCGCCATCATCAAG                   |
| GGPPS-qPCR-F     | TAGAGTTCCTCAGTTACGCACAG                  |
| GGPPS-qPCR-R     | GCCAGTTCTCTGTCTTTTGTATCC                 |
| PSY1-qPCR-F      | CCCGGACTGCTGTGTTTAAT                     |
| PSY1-qPCR-R      | GAGCAAGGATGCCTCAAATC                     |
| CRTISO-qPCR-F    | TTCTTTCCATTACATGGGTGTT                   |
| CRTISO-qPCR-R    | TCATCCTCAAGCACAAAATGGT                   |
| PDS-qPCR-F       | ATAATTGGCGGACAGGCATA                     |
| PDS-qPCR-R       | CCTCTGTGCTCACTCGATCA                     |
| ZDS-qPCR-F       | ATCAGTGCTCGTTGTATGCTTACTATATT            |
| ZDS-qPCR-R       | CCCTTGAGCATCCGCAAT                       |
| LCYE-qPCR-F      | CAACTGGATATTGAGGGCATCA                   |
| LCYE-qPCR-R      | CAAGGAAACCGTGCCACATC                     |
| LCYB1-qPCR-F     | GGCTATATGGTGGCAAGGACTT                   |
| LCYB1-qPCR-R     | CAGAATTGAGGCTTCGAACGA                    |
| LCYB2-qPCR-F     | CCCTATTTCCATTAGGCCGC                     |
| LCYB2-qPCR-R     | CACGTCATATCGAATACGATC                    |
| BCH1-qPCR-F      | TTTGGGATGGCCTACATGTTC                    |
| BCH1-qPCR-R      | GGCACGTCGGCAATGG                         |

---



---

|                |                          |
|----------------|--------------------------|
| BCH2-qPCR-F    | TTTGGGCAAGGTGGGCTCATAG   |
| BCH2-qPCR-R    | GAGTCCTGGAACGATGCCTTTG   |
| CYP97C1-qPCR-F | TCTATGTTAGTTGCGGGCCA     |
| CYP97C1-qPCR-R | GGAGGATGTGGGTAGAGACG     |
| CYP97A3-qPCR-F | AGAGGCGAAAGGGACAATCA     |
| CYP97A3-qPCR-R | ACGCCATATCTCCCCATCTG     |
| CCD4B-qPCR-F   | CAGCAAGAAATTTGGAGTTG     |
| CCD4B-qPCR-R   | CGTAAAATCTTCTTGAGAC      |
| ZEP-qPCR-F     | GAAGCAATTCTTCGACGTGACA   |
| ZEP-qPCR-R     | ACCGAGTCCCCAAGCAAAGT     |
| VDE-qPCR-F     | GTACTGGCTTGCATGTTTTTGGTC |
| VDE-qPCR-R     | GCCGATTGTTGCAGGTTTGA     |

---
